1 **Transcriptome responses of the aphid vector *Myzus***  
2 ***persicae* are shaped by identities of the host plant**  
3 **and the virus**

4 Quentin Chesnais<sup>1,a</sup>, Victor Golyaev<sup>2,a</sup>, Amandine Velt<sup>1</sup>, Camille Rustenholz<sup>1</sup>, Maxime Verdier<sup>1</sup>,  
5 Véronique Brault<sup>1</sup>, Mikhail M. Pooggin<sup>2,b</sup>, Martin Drucker<sup>1,b</sup>

6

7 <sup>1</sup> SVQV, UMR1131, INRAE Centre Grand Est – Colmar, Université Strasbourg, France

8 <sup>2</sup> PHIM, Plant Health Institute, University of Montpellier, INRAE, CIRAD, IRD, Institute Agro,  
9 Montpellier, France

10 <sup>a</sup> Contributed equally

11 <sup>b</sup> Correspondence: Martin Drucker, Mikhail M. Pooggin

12 Authors' emails: Quentin Chesnais, [quentin.chesnais@inrae.fr](mailto:quentin.chesnais@inrae.fr); Victor Golyaev,  
13 [victor.golyaev@gmail.com](mailto:victor.golyaev@gmail.com); Amandine Velt, [amandine.velt@inrae.fr](mailto:amandine.velt@inrae.fr); Camille Rustenholz,  
14 [camille.rustenholz@inrae.fr](mailto:camille.rustenholz@inrae.fr); Maxime Verdier, [maxime.verdier@inrae.fr](mailto:maxime.verdier@inrae.fr); Véronique Brault,  
15 [veronique.brault@inrae.fr](mailto:veronique.brault@inrae.fr); Mikhail M. Pooggin, [mikhail.pooggin@inrae.fr](mailto:mikhail.pooggin@inrae.fr); Martin Drucker,  
16 [martin.drucker@inrae.fr](mailto:martin.drucker@inrae.fr)

17 ORCID Numbers:

18 Quentin Chesnais - 0000-0002-0481-2335

19 Martin Drucker - 0000-0002-9765-1189

## 20 Abstract

21 **Background:** Numerous studies have documented modifications in vector orientation behavior,  
22 settling and feeding behavior, and/or fecundity and survival due to virus infection in host plants. These  
23 alterations are often expected to enhance virus transmission, which has led to the hypothesis that such  
24 effects are vector manipulations by the virus. However, until now, the gene expression changes  
25 correlating with these effects and indicative of modified vector pathways and mechanisms are mostly  
26 unknown.

27 **Results:** Transcriptome profiling of *Myzus persicae* aphids feeding on turnip yellows virus (TuYV) and  
28 cauliflower mosaic virus (CaMV) infected *Arabidopsis thaliana* and *Camelina sativa* revealed a  
29 substantial proportion of commonly deregulated genes, amongst them many with general functions  
30 in plant-virus-aphid interactions. We identified also aphid genes specifically deregulated by CaMV or  
31 TuYV infection, which might be related to the viral transmission mode. Furthermore, we observed  
32 strong host-specific differences in the gene expression patterns with plant virus infection causing more  
33 deregulations of aphid genes on *A. thaliana* than on *C. sativa*, likely related to the differences in  
34 susceptibility of the plant hosts to these viruses. Finally, stress-related aphid genes were  
35 downregulated in *M. persicae* on both infected plants, regardless of the virus.

36 **Conclusions:** TuYV, relying on the circulative persistent mode of transmission, tended to affect  
37 developmental genes. This could increase the proportion of alate aphids, but also affect their  
38 locomotion, neuronal activity, and lifespan. CaMV, using the non-circulative non-persistent mode of  
39 transmission, had a strong impact on feeding-related genes and in particular those related to salivary  
40 proteins. In general, these transcriptome alterations targeted pathways that seem to be particularly  
41 adapted to the transmission mode of the corresponding virus and could be evidence of vector  
42 manipulation by the virus.

43 **Keywords:** Caulimovirus, polerovirus, aphid vector, insect-plant interactions, transmission,  
44 transcriptome profiling, RNA-seq

## 45 Introduction

46 Aphids are major pests not only because they deprive plants of nutrient resources when feeding on  
47 phloem sap but also because they transmit many plant-pathogenic viruses. Indeed, most plant viruses  
48 rely on vectors for transmission to a new susceptible host (Dietzgen et al., 2016). As phloem-feeders,  
49 aphids play a preponderant role in plant virus transmission, because their particular feeding behavior  
50 allows direct delivery of virus particles into the cytoplasm of cells in the epidermis, mesophyll, vascular  
51 tissue and/or the phloem sap of a new host. Their hypodermic needle-like mouthparts, the stylets, can  
52 penetrate cuticle and cell walls and enter into plant cells and sieve tubes without inflicting any major  
53 damage. More precisely, aphids alighting on a new plant will initiate probing phases (i.e. test the  
54 potential host for suitability) consisting of extracellular pathways and exploratory intracellular  
55 punctures into the epidermis and underlying tissues and, if accepted, plunge then their stylets into the  
56 sieve cells whose sap constitutes their principal food source (Tjallingii and Hogen Esch, 1993). During  
57 the probing and feeding phases, aphids secrete different saliva types that contain amongst other  
58 compounds effector molecules modulating interactions with the plant immune system and  
59 susceptibility (Rodriguez and Bos, 2013).

60 Viral infection often modifies plant phenotypical traits such as leaf color, morphology, surface  
61 properties, composition and quantity of volatile organic compounds (VOCs) and metabolites  
62 (Matthews, 2014). This may impact vector behavior and performance, i.e. attract/deter vectors,  
63 modify their feeding behavior and incite/discourage colonization (reviewed by Fereres and Moreno,  
64 2009). There is evidence that such virus-mediated modifications can facilitate virus transmission, a  
65 concept known as ‘pathogen manipulation’. The modifications depend on the viruses’ modes of  
66 transmission (Mauck et al., 2012; Mauck et al., 2018). So-called non-persistent/non-circulative viruses  
67 have fast transmission kinetics and are acquired and inoculated, but also lost from the vectors, within  
68 seconds to minutes (Day and Irzykiewicz, 1954). The non-circulative viruses rely on other parameters  
69 for optimal transmission than so-called persistent/circulative viruses that have slow transmission  
70 kinetics (hours to days) as the virus is injected as a saliva component into a new host, following the  
71 passage of viral particles from the intestine to the salivary glands through the hemolymph.  
72 Consequently, vectors retain and transmit the circulative viruses for weeks or lifelong (reviewed by  
73 Gray and Banerjee, 1999).

74 How virus-mediated plant modifications translate into changes in vector behavior and performance, is  
75 largely unknown (reviewed by Dáder et al., 2017; Fereres and Moreno, 2009; Mauck et al., 2019). It is  
76 assumed that most of the modifications are indirect, i.e. aphids and other vectors react to virus-  
77 induced changes in the plant. For example, yellowing symptoms induced by virus infection may attract  
78 and encourage the settling of insect vectors (for example, Chesnais et al., 2022b; Johnston and Martini,  
79 2020). A well-characterized example of such plant modifications by non-persistent, non-circulative  
80 viruses is the cucumber mosaic virus (CMV, genus *Cucumovirus*, family *Bromoviridae*). VOCs emitted  
81 by CMV-infected squash attract the green peach aphid (*Myzus persicae*, hereafter *Myzus*), but once  
82 landed on the infected squash, the poor palatability of the plant incites the aphids to leave fast (Mauck  
83 et al., 2010; Mauck et al., 2014). This aphid behavior is perfectly adapted to an efficient acquisition and  
84 transmission of CMV which relies on a short acquisition time and a rapid dispersal for propagation  
85 (Bhargava, 1951). Therefore, this example might be considered as ‘host manipulation’. Although there  
86 are more examples in the literature (reviewed by Dáder et al., 2017; Fereres and Moreno, 2009), host-  
87 induced vector manipulation by non-persistent/non-circulative viruses is rather under-explored. The  
88 non-circulative virus studied here – cauliflower mosaic virus (CaMV, genus *Caulimovirus*, family  
89 *Caulimoviridae*) – follows the same transmission kinetics as CMV except that it is retained longer (hours  
90 range) in its aphid vectors (Markham et al., 1987) and therefore its transmission mode has been

91 classified also as ‘semi-persistent’, a term coined by Sylvester (1956). Previous work (Chesnais et al.,  
92 2019) showed that Myzus vectors did not show any preference for *Camelina sativa* (hereafter  
93 Camelina) plants infected with the severe CaMV isolate B-JI, but the number of intracellular probing  
94 punctures was increased and phloem ingestion and fecundity reduced on infected plants. Using CaMV-  
95 infected *Arabidopsis thaliana* (hereafter Arabidopsis) as virus host, Myzus spent less time in the  
96 pathway phase and more time feeding on phloem and aphid fecundity was lowered, compared to  
97 healthy control plants (Chesnais et al., 2021). A similar feeding behavior was observed for Myzus  
98 feeding on Arabidopsis infected with the milder CaMV isolate Cm1841r but in contrast to plants  
99 infected with the B-JI isolate, fecundity was not affected (Chesnais et al., 2021). Thus, there are  
100 contrasting results on possible manipulation of host plants by CaMV that might depend on the virus  
101 isolate and host plant species.

102 Quite a body of evidence for ‘manipulation’ by persistent/circulative viruses has been collected for  
103 poleroviruses (genus *Polerovirus*, family *Solemoviridae*). Most studies on poleroviruses have shown  
104 that virus-infected plants are more attractive to aphids than healthy plants and that aphid feeding is  
105 improved and fecundity higher on infected plants (reviewed by Bosque-Pérez and Eigenbrode, 2011;  
106 Dáder et al., 2017; Mauck et al., 2018). Curiously, aphid preference changed after polerovirus  
107 acquisition, and aphids carrying poleroviruses preferred healthy plants over virus-infected plants  
108 (Alvarez et al., 2007; Carmo-Sousa et al., 2016). There is evidence that purified virus particles can bring  
109 along this preference change (Ingwell et al., 2012), indicating that for persistent/circulative viruses,  
110 not only host plant-mediated changes but also direct virus-mediated changes in aphids are to be  
111 considered. The circulative virus studied here, turnip yellows virus (TuYV, genus *Polerovirus*, family  
112 *Solemoviridae*), increases emission of VOCs in two host plants, Arabidopsis and Camelina, but only  
113 TuYV-infected Camelina, and not TuYV-infected Arabidopsis, attracted Myzus more than did healthy  
114 control plants (Claudel et al., 2018). Aphids feed longer from the phloem of TuYV-infected Camelina  
115 than from that of healthy Camelina, which might favor the acquisition of phloem-limited TuYV  
116 (Chesnais et al., 2019). Recently, a post-acquisition effect of TuYV was observed: virus-carrying Myzus  
117 aphids showed increased vector locomotory and fecundity as well as prolonged phloem feeding  
118 behavior. However, in this study, the authors did not distinguish between direct effects of the virus on  
119 the vector and indirect effects mediated by the infected host plant (Chesnais et al., 2020).

120 While virus-mediated effects on aphids and other hemipteran vectors are well documented,  
121 knowledge on the molecular mechanisms and the involved aphid genes is scarce. Published examples  
122 indicate that deregulation of aphid genes related to stress, cuticle, development and nucleic factors is  
123 a common feature of aphids feeding on plants infected with poleroviruses or luteoviruses (Brault et  
124 al., 2010; Li et al., 2020; Patton et al., 2021). For non-circulative viruses, the effect of viral infection of  
125 plants on aphids seems more variable. CMV acquisition by Myzus from infected tobacco changed the  
126 expression of vector genes related to metabolism, stress, and cuticle (Liang et al., 2021), whereas a  
127 study on the soybean aphid *Aphis glycines* fed on soybean plants infected with soybean mosaic virus  
128 (SMW, genus *Potyvirus*, family *Potyviridae*) has revealed only minor changes in aphid gene expression  
129 (Cassone et al., 2014).

130 In this paper, we explored how infection of plants with circulative versus non-circulative virus affects  
131 the transcriptome of viruliferous aphids. We specifically addressed whether the transmission mode  
132 influenced the aphid transcriptome profiles and whether alterations in the aphid transcriptome  
133 correlated with distinct behaviors of viruliferous aphids. We identified common and virus-specific  
134 deregulated genes as well as plant host-specific effects on aphids. The aphid *M. persicae* was selected  
135 for this study because it is an excellent vector for both the circulative, persistent TuYV and the non-

136 circulative, semi-persistent CaMV. On the plant side, we selected two species of the same family  
137 Brassicaceae, *A. thaliana* and *C. sativa* that are suitable hosts for both viruses.

## 138 **Material and methods**

### 139 **Aphids**

140 The green peach aphid (*Myzus persicae* Sulzer, 1776) clone WMp2, originally isolated in the  
141 Netherlands (Reinink et al., 1989) and maintained in Colmar since 1992, was used for the experiments.  
142 It was reared on Chinese cabbage (*Brassica rapa* L. pekinensis var. Granaat) in a growth chamber at  
143 20±1 °C and a 16 h photoperiod. Plants were grown in TS 3 fine substrate (Klasmann-Deilmann) in  
144 round 13 cm diameter pots and watered with fertilizer 209 (Fertil SAS) dissolved in tap water. Only  
145 wingless morphs were used in assays. For synchronization, adults were placed on detached Chinese  
146 cabbage leaves that were laid on 1 % agarose (Euromedex) in a Petri dish. The adults were removed  
147 24 h later and the newborn larvae used in transcriptomic experiments 5 days later.

### 148 **Viruses**

149 CaMV isolate Cm1841r (Chesnais et al., 2021), which is an aphid-transmissible derivative of isolate  
150 Cm1841 (Tsuge et al., 1994), and TuYV isolate TuYV-FL1 (Veidt et al., 1988) were maintained in  
151 Arabidopsis Col-0 and propagated by aphid inoculation of 2-week-old plants. Plant growth conditions  
152 were as described below.

### 153 **Virus infection and aphid infestation**

154 Seeds of *Arabidopsis thaliana* Col-0 or *Camelina sativa* var. Celine were germinated in TS 3 fine  
155 substrate (Klasmann-Deilmann) in 7\*7 cm pots and watered with tap water. Growth conditions were  
156 14 h day 10 h night with LED illumination and a constant temperature of 21±1 °C. Two-week-old plants  
157 were inoculated with 3-5 wingless Myzus aphids that had been allowed a 24 h acquisition access period  
158 on Arabidopsis infected with TuYV or CaMV or on healthy Arabidopsis. Plants were individually  
159 wrapped in clear plastic vented bread bags to prevent cross contamination. Aphids were manually  
160 removed after a 48 h inoculation period. Eighteen days post-inoculation (dpi), 25 to 30 synchronized  
161 5-day-old non-viruliferous aphids were placed for infestation on the rosette (Arabidopsis) or the apical  
162 leaves (Camelina) of CaMV- or TuYV-infected or mock-inoculated plants. After 72 h infestation (= 21  
163 dpi), aphids were collected with a brush. Three biological replicates were used for analysis. For  
164 Arabidopsis, one biological replicate consisted of 4 plants, from which 25-30 aphids were collected  
165 (total of 100-120 aphids). For Camelina, one replicate was 3 plants from which 30 aphids were collected  
166 (total of 90-100 aphids). Aphid samples were deep-frozen by placing them in a -80 °C freezer and  
167 conserved at this temperature until processing.

### 168 **RNA purification and Illumina sequencing**

169 Total RNA was extracted from aphids with TRI Reagent (Molecular Research Center) and chloroform  
170 followed by isopropanol (Merck) precipitation. Briefly, 10-50 mg of frozen aphids were placed in a  
171 mortar cooled with liquid N<sub>2</sub>, homogenized in 1 ml TRI Reagent and incubated for 2 hours at room  
172 temperature. Subsequent phase separation by addition of 200 µl cold chloroform (Merck) and  
173 centrifugation for 15 min at 12,000 g was followed by RNA precipitation with 500 µl cold isopropanol.  
174 After 10 min centrifugation at 12,000 g, the RNA pellet was washed twice with 1 ml of 75 % ethanol  
175 (Merck), air-dried and resuspended in 30 µl RNase-free water (Merck). RNA quantity and purity were  
176 measured using NanoDrop 2000c Spectrophotometer (Thermo Fisher Scientific). RNA integrity was  
177 verified by capillary electrophoresis on LabChip GX (Perkin Elmer).

178 Illumina sequencing of 18 aphid total RNA samples was performed at Fasteris ([www.fasteris.com](http://www.fasteris.com)) using  
179 a standard protocol with the TruSeq Stranded mRNA Library Prep kit (Illumina). All the libraries (3  
180 biological replicates per each of the six conditions [i.e., aphids on mock-inoculated, TuYV- and CaMV-  
181 infected Arabidopsis and aphids on mock-inoculated, TuYV- and CaMV- infected Camelina]) were  
182 multiplexed in one NovaSeq flowcell SP-200 with 2x75 nt paired-end customized run mode. The  
183 resulting 75 nt reads from each library were used for Myzus transcriptome profiling.

#### 184 **RT-qPCR**

185 For RT-qPCR analysis of Myzus gene expression, 10 µg total RNA was converted into cDNA using AMV  
186 Reverse Transcriptase (Promega) and oligo-dT primer. Real-time qPCR reactions (10 µl) including 3 µl  
187 of cDNA, 0.5 µl of each 10 µM primer, 5 µl of SybrGreen master mix (Roche) and 1 µl of water were  
188 processed in a LightCycler® 480 instrument (Roche) using the SybrGreen master mix (Roche) following  
189 the recommended protocol. The thermocycler conditions were as follows: pre-incubation at 95 °C for  
190 5 min, followed by 40 cycles of 95 °C for 10 s, 58 °C for 20 s and 72 °C for 20 s. The gene expression  
191 was normalized to the *Myzus persicae* internal reference gene EF1alpha (Naessens et al., 2015;  
192 Webster et al., 2018) (for primer sequences of targeted genes and of the internal reference gene see  
193 Table S2).

#### 194 **Raw data processing and quality control for transcriptome profiling**

195 Processing was carried out on the Galaxy France platform (<https://usegalaxy.fr/>) (Afgan et al., 2016).  
196 Raw reads quality was checked with FastQC (v0.11.8) and the results were then aggregated with  
197 MultiQC (v1.9). Reads were aligned on the *Myzus persicae* O reference genome  
198 ('Myzus\_persicae\_O\_v2.0.scaffolds.fa' (annotations :  
199 'Myzus\_persicae\_O\_v2.0.scaffolds.braker2.gff3') downloaded from BIPAA portal  
200 ([https://bipaa.genouest.org/sp/myzus\\_persicae/](https://bipaa.genouest.org/sp/myzus_persicae/)) (Mathers et al., 2021) with STAR (v2.7.6a) and  
201 quality was again checked with MultiQC. Gene counts were obtained with featureCounts (v2.0.1).  
202 Differential gene expression was then analyzed with SARTools (v1.7.3) and the DESeq2 method (i.e.  
203 aphids on TuYV-infected plants vs. mock-inoculated plants, aphids on CaMV-infected plants vs. mock-  
204 inoculated plants, and aphids on TuYV-infected plants vs. CaMV-infected plants). GO enrichment  
205 analysis of the DEGs was performed with Goseq (v1.36.0) (Young et al., 2010). We used default  
206 parameters for all steps except for featureCounts where the following deviating parameters were  
207 used: only the primary alignment was taken into account (not multi-mapped reads), exclude chimeric  
208 fragments = Yes (-C option, signifying that the fragments that have their two ends aligned to different  
209 chromosomes were NOT included for summarization), minimum base overlap = 1.

## 210 **Results and discussion**

### 211 **Quality control and validation of RNA-seq data**

212 For aphids on Arabidopsis, between 64.6 and 88.8 million 75 nt paired-end reads were obtained with  
213 a mean phred score >30 for all bases. For aphids on Camelina, between 61.8 and 82.4 million 75 nt  
214 paired-end reads were obtained with a mean phred score >30 for all bases. In all samples, there were  
215 no overrepresented sequences and only a few adapter-containing reads (0.20 % reads with adapter  
216 sequence at the last bases). Between 85.6 % and 88.7 % of reads were uniquely mapped to the aphid  
217 genome for Arabidopsis (Supplementary Table S1a) and between 81.8 % and 87.6 % of reads were  
218 uniquely mapped to the aphid genome for Camelina (Supplementary Table S1b). Of these, between  
219 87.4 % and 88.3 % of uniquely aligned reads were assigned to an aphid gene on Arabidopsis and 83.4 %  
220 to 86.8 % aligned reads were assigned to an aphid gene on Camelina. We did not look for the nature

221 of the unaligned reads; they might derive from endosymbionts, contaminating biologic material from  
222 plants, fungi, bacteria and the like.

223 Exemplarily, a similar trend of gene deregulation was confirmed by RT-qPCR for four Myzus genes with  
224 different levels of deregulation and expression, but the same trend in both infection conditions. We  
225 screened only four genes as in a previous work on aphid transcriptomics (Liu et al., 2012). Three genes  
226 showed the same trend of downregulation in RNA-seq and RT-qPCR experiments, while the fourth  
227 (g15329) was found to be upregulated in all RNA-seq and RT-qPCR experiments, except for RT-qPCR  
228 on TuYV-infected plants (Supplementary Figure S1). The discrepancy in the results for g15329  
229 expression was likely due to its weak expression changes that in general are difficult to detect by RT-qPCR  
230 because of the exponential amplification kinetics of this technique. We observed the same  
231 phenomenon in a previous validation experiment (Chesnais et al., 2022a).

232 Principal component analysis of RNA-seq datasets (Figure 1a) indicated good clustering of the three  
233 biological replicates of aphids fed on mock-inoculated or virus-infected Arabidopsis. One of the three  
234 biological replicates of aphids fed on CaMV-infected Arabidopsis grouped less well with the other two  
235 but was still within an acceptable range. In the case of Camelina, the three replicates for each virus  
236 (TuYV and CaMV) clustered well together, indicating homogeneity of the replicates (Figure 1b). The  
237 Myzus data for Camelina infected with TuYV and CaMV were more similar to each other than those for  
238 Arabidopsis, indicating that the transcriptome changes in aphids fed on Camelina were less dependent  
239 on the virus species than those on Arabidopsis. In the case of mock-inoculated Camelina, two of the  
240 three replicates clustered together and were well separated from the data for virus-infected Camelina,  
241 while the third replicate clustered with the aphid data from infected plants and was therefore excluded  
242 from further analysis (Figure 1b). The transcriptomes of the plants used here for aphid infestation were  
243 analyzed in another study (Chesnais et al., 2022a). There the three replicates from mock-infected  
244 Camelina clustered closely together in principal component analysis. This indicates that the outlier  
245 behavior observed here was not caused by the plant itself but by another cause, which remains elusive.  
246 Taken together, all samples except one mock replicate of Camelina were suitable for transcriptome  
247 analysis.

## 248 **Global analysis of differentially expressed aphid genes**

249 Analysis of RNA-seq data revealed twice as many differentially expressed genes (DEGs) (false discovery  
250 rate <0.05) in aphids feeding on virus-infected Arabidopsis (4,060 for TuYV and 3,998 for CaMV) as in  
251 aphids feeding on virus-infected Camelina (1,771 for TuYV and 1,890 for CaMV), compared to aphids  
252 from mock-inoculated controls (Figure 1c, 1d and 1e). Remarkably, each virus modified the expression  
253 of about the same number of genes in aphids fed on the same host. Moreover, for each plant species,  
254 about 2/3 of aphid DEGs were common for the two viruses, indicating a profound common response  
255 of aphids to feeding on infected plants, independent of the virus species and of the transmission mode  
256 (Figure 1c and 1d). Like the number of aphid DEGs, also the proportion of up- and downregulated  
257 aphid genes was virus-independent, with ca. 45 % of the aphid DEGs being upregulated after feeding  
258 on TuYV- or CaMV-infected Arabidopsis, and ca. 75 % and ca. 81 % being upregulated after feeding on  
259 TuYV- and CaMV-infected Camelina, respectively (Figure 1e). The differences in the number and  
260 proportion of up- and downregulated aphid DEGs between Arabidopsis and Camelina indicated an  
261 important plant species effect on the aphid transcriptome, which was independent of the virus. On the  
262 other hand, for each plant species, ca. 1/3 of the aphid DEGs was specific for each virus, indicating that  
263 the virus species (and, possibly, the transmission mode) had a substantial and characteristic impact on  
264 the aphid transcriptome.

## 265 **Impact of CaMV and TuYV infection on aphid metabolic pathways**

## 266 **Gene ontology analysis of *Myzus infesting CaMV- or TuYV-infected plants***

267 Using gene ontology (GO) analysis, we first looked at the effects of virus-infected Arabidopsis on the  
268 aphid transcriptome (Figure 2). In aphids fed on TuYV-infected Arabidopsis, 11 of the Top 25 enriched  
269 GO categories of DEGs classified as Biological Processes (BP) (Figure 2a). The most affected processes  
270 were 'oxidation-reduction' (BP), 'integral component of membrane' (belonging to the category Cellular  
271 Component [CC]), and the rather general process 'ATP-binding' (belonging to the category Molecular  
272 Function [MF]). Other prominent processes were related to protein synthesis and metabolism  
273 (translation initiation, protein synthesis, endopeptidase activity, protein folding, proteasome-  
274 mediated protein degradation and unfolded protein binding). Similarly, the most deregulated  
275 processes of aphids feeding on CaMV-infected Arabidopsis were 'oxidation-reduction (BP)', 'integral  
276 component of membrane (CC)' and 'ATP binding (MF)', followed by protein synthesis and metabolism-  
277 related processes (Figure 2b).

278 A different picture was found for *Myzus* on virus-infected *Camelina* (Figure 2c). In the case of TuYV  
279 infection, only 8 categories [2 in biological processes (BP), 3 in cellular components (CC) and 3 in  
280 molecular functions (MF)] were identified by GO Top 25 analysis as being significantly enriched. Three  
281 of them (Figure 2d) were also identified in aphids from CaMV-infected *Camelina*, but none of them in  
282 aphids from infected Arabidopsis. The enriched processes included chitin-related processes (chitin  
283 binding, MF; chitin metabolic processes, BP; structural constituent of cuticle, MF), transcription  
284 (transcription factor complex, CC), oxidation reduction (oxidoreductase activity, MF) and plasma  
285 membrane-related processes (homophilic cell adhesion via plasma membrane, BP; plasma membrane,  
286 CC; extracellular region, CC). Although none of these GOs figured among the Arabidopsis Top 25 GO,  
287 there were three GO categories (related to oxidation/reduction and plasma membrane processes) that  
288 were similar to GOs identified in aphids fed on Arabidopsis.

289 Taken together, GO analysis revealed distinct, plant host-specific impacts on the aphid gene  
290 expression, which were rather independent of the virus species. Feeding on virus-infected Arabidopsis  
291 had a much more profound impact on aphids than feeding on virus-infected *Camelina* (Figure 2a,b vs  
292 2c,d).

293 Since the current annotation of the *Myzus* genome was not as advanced as for other model organisms  
294 such as *Drosophila melanogaster*, we complemented our above-described GO analysis by analysis of  
295 Kyoto Encyclopedia of Genes and Genomes (KEGG) pathways (Kanehisa, 1996). This analysis showed  
296 that similar percentages of genes involved in 'genetic information processing', 'metabolism' and  
297 'signaling and cellular processes' were modified in aphids feeding on both plant hosts (Figure S3).

## 298 **General heatmap analysis of DEGs**

299 To better visualize the aphid transcriptome changes, heatmaps presenting all DEGs in aphids infesting  
300 Arabidopsis or *Camelina* were generated (Figure 3a and 3b). The profiles of all aphid replicates fed on  
301 mock-inoculated Arabidopsis or *Camelina* clustered well together, while the profiles from aphids  
302 feeding on virus-infected plants (CaMV and TuYV) did not. This again indicated that, in our experiment,  
303 effects of infection on aphid genes were largely independent of the virus species. Like the global  
304 analysis (Figure 1e), the heat maps showed also that *Myzus* on virus (TuYV or CaMV)-infected *Camelina*  
305 displayed proportionally more up- than downregulated genes, compared to *Myzus* on mock-inoculated  
306 *Camelina*, whereas proportions of up- and downregulated DEGs in aphids feeding on virus-infected vs  
307 mock-inoculated Arabidopsis were similar. The significance of these plant host-specific effects remains  
308 to be investigated. We speculate that *Myzus* might have more difficulties in establishing infestation on  
309 Arabidopsis than on *Camelina*, visible by the higher number of DEGs that is indicative of extensive  
310 transcriptome reprogramming to adapt to the new plant host.



311 In summary, both GO and a general heatmap analyses indicated an important effect of plant infection  
312 on the aphid transcriptome, which was strongly shaped by the host plant identity (2/3 of the DEGs)  
313 and less so by the virus species (1/3 of the DEGs) and therefore the virus transmission mode.

## 314 **Discussion of DEGs by classes**

315 In the following section, aphid DEGs were classified in several categories using as criteria whether or  
316 not the genes were differentially expressed in specific conditions (plant host species and virus identity)  
317 (Figure 4). The rationale was to identify genes that were general players in plant-virus-aphid  
318 interactions (i.e. deregulated by both viruses and on both host plants; Figure 4a) and genes that were  
319 specifically deregulated either by one virus species or by one host species. Then, we extracted aphid  
320 DEGs related to one virus and conserved regardless of the host plant to highlight virus  
321 species/transmission mode-specific genes that were not sensitive to the host plant identity (Figure 4b).  
322 Finally, we compared TuYV vs CaMV effects on each host plant to reveal additional, host plant-specific,  
323 'manipulation strategies' linked to the virus transmission mode (Figure 4c).

### 324 **1 Common deregulated genes in aphids feeding on CaMV- and TuYV-infected Arabidopsis** 325 **and Camelina**

326 This analysis was carried out on genes differentially up- or downregulated under all conditions. No  
327 homolog was identified for up-regulated genes. In the case of downregulated genes, we found some  
328 genes homologs where one homolog was downregulated for one virus and another one for the other  
329 virus (Table 1). For example, we identified two potentially secreted homologous cathepsin B-like  
330 proteases (g8486 for aphids infesting TuYV-infected plants and g24532 for aphids infesting CaMV-  
331 infected plants). These homologs were included in the analysis. The rationale was that one specific  
332 host or infection condition might deregulate a specific gene but that the overall effect on plant aphid  
333 interactions might be the same or very similar for both genes (in this case the two cathepsin Bs might  
334 have a similar role as saliva effectors).

#### 335 **1a Aphid genes UPREGULATED by both VIRUSES on both PLANTS**

336 Only five genes were upregulated in Myzus feeding on both CaMV- and TuYV-infected vs mock-  
337 inoculated plants. Two of them (g22946 and g22969) code for titins, which are structural muscle  
338 proteins (Lemke and Schnorrer, 2017) (Table 1). Their upregulation could potentially affect locomotion  
339 behavior and facilitate intra or inter-plants vector movement, as was recently observed for TuYV-  
340 viruliferous aphids (Chesnais et al., 2020). The third commonly upregulated gene (g6068) codes for a  
341 vasodilator-stimulated phosphoprotein-like (VASP) protein, which is associated with actin filaments  
342 and focal adhesions (Ahern-Djamali et al., 1998). It can participate in neural development and function,  
343 as suggested for its Drosophila homolog Ena (Ahern-Djamali et al., 1998). Transferred to the present  
344 work, VASP might be induced by viruses to modulate aphid development and behavior, a feature that  
345 has been reported several times in the recent literature (Mauck et al., 2018). The fourth gene  
346 upregulated in all modalities encodes an angiotensin-converting enzyme-like protein (g22588), the  
347 orthologue of *Acyrtosiphon pisum* ACE1. g22588 contains a signal peptide and could therefore be a  
348 saliva protein. *Acyrtosiphon pisum* ACE1 is expressed in salivary glands and modulates aphid-plant  
349 interactions by affecting the feeding behavior and survival of aphids on host plants (Wang et al., 2015).  
350 More precisely, silencing of ACE1 and ACE2 shortened the lifespan of *A. pisum* on plants but not in  
351 membrane feeding assays. Thus, the ACE1 g22588 possibly counteracts plant defenses and its  
352 overexpression could help Myzus to better cope with plant defenses and to increase its lifespan. ACE  
353 and other metalloproteases have also been found in the saliva of other phytophagous and blood-  
354 feeding arthropods (Decrem et al., 2008; Stafford-Banks et al., 2014) and are believed to be part of  
355 their arsenal counteracting defense responses of their hosts (reviewed by Chen and Mao, 2020; Hopp  
356 and Sinnis, 2015; Pham et al., 2021; Wang et al., 2017). Thus, the increased expression of ACE, as

357 observed here in the interaction of Myzus with two viruses and on two host plants, could be a common  
358 ‘manipulation strategy’ shared among plant viruses to facilitate aphid feeding on virus-infected host  
359 plants and accelerate virus acquisition. The fifth commonly upregulated gene is the uncharacterized  
360 Myzus gene g27731 encoding a protein with MATH and LRR domains. Since the LRR domain is  
361 evolutionary conserved in many proteins associated with innate immunity pathways (Ng and Xavier,  
362 2011), this protein might be a good candidate for further studies on virus-mediated manipulation of  
363 insect vectors.

#### 364 ***1b Aphid genes DOWNREGULATED by both VIRUSES on both PLANTS***

365 We found 18 common downregulated genes (including some homologs) in aphids fed on virus-infected  
366 plants, 13 of which are implicated in aphids’ physiological responses to plant defenses, i.e. stress-  
367 related genes (Table 1). Previously, we have demonstrated that plant infection with CaMV and TuYV  
368 alters primary and secondary metabolism in Arabidopsis and Camelina strongly (Chesnais et al.,  
369 2022a). Consequently, aphids could also be stressed on the infected plants because of these important  
370 alterations of the plants. However, we found that stress-related aphid genes were downregulated in  
371 Myzus feeding on virus-infected plants. This suggests that plant infection with TuYV or CaMV could  
372 facilitate aphid infestation. The downregulated stress genes included those encoding the metabolic  
373 enzymes cytochrome P450s, glutathione-S-transferase and UDP-glucuronosyl transferases which can  
374 play a key role in detoxifying plant secondary metabolites (Brierley and Burchell, 1993; Li et al., 2007).  
375 We also noticed downregulation of genes encoding FE4-like esterases that belong to another class of  
376 enzymes involved in detoxification and that can confer insecticide resistance in Myzus (Field and  
377 Devonshire, 1998). Likewise, Myzus genes coding for CHK domain-containing proteins were  
378 downregulated (Table 1). CHKs (checkpoint kinases) are major mediators of cell cycle checkpoints in  
379 response to genotoxic and other stresses (de Vries et al., 2005).

380 Another aphid gene downregulated under all conditions encodes for a facilitated transmembrane  
381 trehalose transporter, Tret1. Trehalose ( $\alpha$ -D-glucopyranosyl-(1,1)- $\alpha$ -D-glucopyranoside) is the main  
382 hemolymph sugar, and Tret1 is necessary for the transport of trehalose produced in the fat body and  
383 its uptake into other tissues that require a carbon source (Kanamori et al., 2010). Deregulation of this  
384 gene following virus acquisition has already been reported in other insect vectors and is not linked to  
385 the virus species or the transmission mode (e.g. Ding et al., 2019; Gamage et al., 2018).

386 As mentioned above, we observed downregulation of distinct Cathepsin B3 (CathB)-encoding genes in  
387 aphids feeding on TuYV- or CaMV-infected vs mock-inoculated plants. CathBs are detoxifying proteases  
388 found in saliva and intestine and are subject to gene amplification, which is thought to be an adaptation  
389 of saliva and intestine of aphids feeding on phloem sap from different plant species (Mathers et al.,  
390 2017; Rispe et al., 2008). The CathB identified in Myzus feeding on TuYV-infected plants (g24532) is  
391 the same as the one described by Guo et al. (2020), and the one found in Myzus infesting CaMV-  
392 infected plants (g8486) is closely related to it (87 % identity on the amino acid level). The latter paralog  
393 (CathB3) is a saliva protease and an effector that induces plant defenses. Therefore, its downregulation  
394 can be proviral by facilitating plant infestation. Up- or downregulation of CathB-encoding genes during  
395 host-virus interactions has been observed in many arthropod vectors (aphids, whitefly, thrips,  
396 leafhoppers, mites and mosquitos), suggesting importance of the cathepsin Bs in virus-host-vector  
397 interactions and, possibly, transmission (Caicedo et al., 2019; Gamage et al., 2018; Gupta et al., 2019;  
398 Hasegawa et al., 2018; Li et al., 2019; Li et al., 2020; Pinheiro et al., 2017; Xu et al., 2021). Another  
399 feeding-related downregulated gene in aphids infesting virus-infected Arabidopsis and Camelina  
400 encodes a sialin (g26345). A mammalian ortholog of the sialin gene encodes a membrane protein of  
401 salivary gland cells controlling osmolarity and composition of saliva (Li et al., 2018). Finally, among  
402 commonly downregulated Myzus genes we identified a gene encoding a farnesol dehydrogenase-like

403 protein (g24472), implicated in hormone metabolism. This gene could be responsible for the oxidation  
404 of farnesol to farnesal, a precursor of the juvenile hormone as shown for mosquitoes (Mayoral et al.,  
405 2009). Downregulation of juvenile hormone can favor wing development (Zhang et al., 2019), which  
406 might facilitate viral spread.

407 Taken together, we observed that among the ‘common’ genes those involved in locomotion, neural  
408 development and lifespan were rather upregulated in aphids feeding on virus-infected plants. This  
409 might favor aphid mobility and survival and in turn virus dispersion. Genes involved in stress responses  
410 and saliva functions were mostly downregulated (except the saliva protein ACE1 contributing to  
411 lifespan), indicating that viral infection facilitates aphid infestation of the host plants, for example by  
412 dampening anti-herbivore plant defenses as observed in our previous study (Chesnais et al., 2022a).

## 413 **2 Virus-specific aphid DEGs on both host-plants**

### 414 **2a TuYV-specific DEGs in Myzus feeding on Arabidopsis and Camelina**

415 To know whether plant viruses can impact aphid genes independently of the plant host, we first  
416 screened for aphid DEGs in common for aphids feeding on TuYV-infected Camelina and Arabidopsis.  
417 We found 19 upregulated genes (see a complete list in Table S3). Two of them might influence aphid  
418 feeding behavior (Table 2a). One (g26473) codes for a putative stylet sheath protein. Stylet sheaths  
419 are formed by gelling saliva that is secreted during stylet penetration in plant tissue. The sheaths  
420 insulate the stylets and potentially protect them from plant defenses and seal cell and phloem  
421 puncture sites (Will et al., 2012). Silencing of an *A. pisum* sheath protein gene disrupted sheath  
422 formation and disturbed phloem-feeding (Will and Vilcinskis, 2015), suggesting that upregulation, as  
423 observed here, might conversely facilitate and accelerate aphid feeding behavior on TuYV-infected  
424 plants (as observed by Chesnais et al., 2020), and hence TuYV acquisition. The second TuYV-specific  
425 feeding-related aphid gene (g15241) codes for a receptor for the insect neuropeptide SIFamide that  
426 might control feeding indirectly by modulating behavior, as shown for SIFamide in the Chagas disease  
427 vector, the kissing bug *Rhodnius prolixus* (Ayub et al., 2020). The other upregulated genes are mostly  
428 related to development. Interestingly, two of them, forkhead box protein O (Foxo) and ATP-binding  
429 cassette sub-family G member 4-like (ABCG4) could be involved in aphid wing formation (Grantham et  
430 al., 2020; Shang et al., 2020). Induction of wings could considerably increase virus propagation by  
431 aphids, especially over long distances, as recently shown for CMV transmission (Jayasinghe et al.,  
432 2021). In this specific case, the wing formation was attributed to a virus satellite co-infecting the plant.  
433 The few downregulated genes (n = 14, see a complete list in Table S3) specific for aphids on TuYV-  
434 infected plants are involved in detoxification and are closely related to the detoxification genes  
435 downregulated by both viruses in all conditions (see the previous section).

### 436 **2b CaMV-specific DEGs in Myzus feeding on Arabidopsis and Camelina**

437 We also analyzed the common and specific DEGs only found in aphids fed on CaMV-infected  
438 Arabidopsis and Camelina. We identified a total of 48 DEGs (31 upregulated and 17 downregulated  
439 genes, see the complete list in Table S4). One of the upregulated genes codes for a glucose  
440 dehydrogenase (Table 2b). Since glucose dehydrogenases are involved in multiple pathways, it is  
441 difficult to attribute a precise role for these enzymes in CaMV-aphid interactions. Several other  
442 upregulated genes might modulate aphid development and feeding behavior. For example, the gene  
443 g21498 codes for a structural RR-2 cuticle protein 3. Other RR-1 and RR-2 cuticle proteins are involved  
444 in virus–vector interactions (Deshoux et al., 2018), and it would be interesting to investigate a possible  
445 role of the RR-2 cuticle protein 3 in CaMV transmission. Another upregulated gene codes for an astacin  
446 (g7709), which belongs to a group of metalloproteases with various functions (Sterchi et al., 2008).

447 Since the astacin identified here contains a signal peptide for secretion, it is tempting to speculate that  
448 it could be released during salivation or digestion and that upregulation might improve feeding.

449 As mentioned in the above section, both TuYV and CaMV infections deregulated some aphid genes  
450 linked to salivary proteins (for example ACE1 and CathB). CaMV acquisition, but not TuYV acquisition,  
451 upregulated in *Myzus* another potential saliva gene coding for a mucin-2-like protein (g27683). In  
452 animals, saliva mucins protect by lubrication soft and hard tissues in the mouth (Turner, 2016). Their  
453 aphid homologs could have similar functions in protecting the stylet surface. Insect mucins have been  
454 studied thoroughly in the brown planthopper *Nilaparvata lugens*. One of them, NIMul, is a major  
455 component of watery and gelling saliva, required for proper feeding (Huang et al., 2017). Another one,  
456 NIMLP, is also involved in sheath formation, but in addition this mucin elicits plant defense responses  
457 (Shangguan et al., 2018). Transferred to aphids, genes encoding mucins could be involved in the  
458 significant phagostimulation observed in aphids on CaMV-infected plants compared to healthy plants  
459 (Chesnais et al., 2021).

460 Among genes downregulated by CaMV (but not by TuYV) in *Myzus* when feeding on both hosts were  
461 other genes coding for potential saliva proteins. One of them (g22531) codes for a 5'-nucleotidase with  
462 some similarities to a 5'-nucleotidase downregulated by various stresses in *A. glycines* (Enders et al.,  
463 2015) and to a saliva-contained 5'-nucleotidase of the mosquito *Aedes aegypti* (Champagne et al.,  
464 1995). A second gene codes for a pancreatic lipase-related 2-like protein (g16515). Similar enzymes  
465 have been identified in the salivary proteome of the potato aphid *Macrosiphum euphorbiae*  
466 (Chaudhary et al., 2015). Other pancreatic lipases are involved in vector interactions with circulative  
467 viruses. A pancreatic lipase from *Rhopalosiphum padi* binds to the CP and RT of barley yellow dwarf  
468 virus (family *Luteoviridae*) in yeast two-hybrid assay (Wang et al., 2015) and the gene expression of  
469 another pancreatic lipase is downregulated in *Bemisia tabaci* fed on TYLCV-infected tomato (Hasegawa  
470 et al., 2018). Thus, an impact of downregulation of this gene on non-circulative CaMV transmission  
471 could be indirect. Among other downregulated genes was the sugar transporter SWEET1-like gene  
472 (g20667), which codes for the midgut receptor of at least three planthopper-transmitted circulative,  
473 propagative viruses (Qin et al., 2018). A role, if any, for this gene in non-circulative transmission of  
474 CaMV by aphids could also be indirect, possibly by increasing feeding activity and concomitant virus  
475 acquisition, due to reduced sugar uptake.

### 476 **3 Host plant-specific aphid DEGs for TuYV vs CaMV**

477 To reveal an additional, host plant-specific, contribution to viral manipulation strategies linked to  
478 circulative vs non-circulative transmission modes, we analyzed DEGs in aphids feeding on TuYV- vs  
479 CaMV-infected *Arabidopsis* and in aphids feeding on TuYV- vs CaMV-infected *Camelina* (Figure 1e,  
480 TuYV vs CaMV). Since for *Arabidopsis* the total number of such aphid DEGs was 380, we applied a cut-  
481 off of log<sub>2</sub>FC (fold changes) > 0.5 for upregulated genes and < -0.5 for downregulated genes to limit  
482 the number to 90 genes. This step was not necessary in the case of *Camelina*, where in total only 22  
483 aphid DEGs were observed (see the complete lists in Tables S3, S4 and S5).

#### 484 **3a TuYV vs CaMV in *Arabidopsis***

485 A higher proportion of genes was upregulated in aphids feeding on TuYV-infected *Arabidopsis*,  
486 compared to aphids infesting CaMV-infected *Arabidopsis* (see Table 3a and Supplementary Table S5-  
487 6). Two of them (g5369 and g10419) encode chitinases that are essential for insect survival, molting  
488 and development (Arakane and Muthukrishnan, 2010). Four other genes encode the development-  
489 related proteins octopamine receptor Oamb (g15146), homeotic protein distal-less-like protein  
490 (g5303), zinc finger protein Elbow (g24564) and bombyxin C-2 like protein (g7214) (Campbell and  
491 Tomlinson, 1998; Ding et al., 2017; Wang et al., 2016; Weihe et al., 2004). Thus, compared to CaMV,

492 TuYV infection of Arabidopsis specifically induces higher expression of aphid genes potentially involved  
493 in wing formation/development. This could promote, as discussed above, the formation of alate  
494 individuals with consequences on TuYV dispersal to new plants.

495 Interestingly, Myzus feeding on CaMV-infected Arabidopsis showed a different subset of  
496 developmental genes expressed at higher levels than Myzus feeding on TuYV-infected Arabidopsis.  
497 Four of these genes encode cuticle proteins (Table 3b and Supplementary Table S6). The fatty acyl-CoA  
498 reductase wat-like isoform X1 gene (g11235) that was also expressed at a higher level in the presence  
499 of CaMV, compared to TuYV, belongs to a gene family mediating the synthesis of insect cuticular  
500 hydrocarbons that are involved in the waterproofing of insect cuticles but also functions in signaling  
501 (Blomquist and Ginzl, 2021).

502 In addition to developmental genes, nine Myzus genes related to defense and detoxification responses  
503 were differentially expressed in Myzus after acquisition of TuYV on Arabidopsis, compared to  
504 acquisition of CaMV on Arabidopsis (Table 3a,b and Supplementary Table S5). For example, variable  
505 deregulations in the different conditions were observed for four genes of the UDP-glucuronosyl  
506 transferase gene family encoding detoxification enzymes (Brierley and Burchell, 1993). However, other  
507 genes that could be related to defense and/or detoxification were expressed at higher levels in CaMV-  
508 exposed aphids compared to aphids fed on TuYV-infected plants, such as the gene encoding the Hyan  
509 serine protease (g21180), which activates the melanization immune response to physical or septic  
510 wounding (Nam et al., 2012) and a gene encoding a histidine-rich glycoprotein (g10551). A gene coding  
511 for an anti-microbial peptide, repetitive proline-rich cell wall protein 2-like (g27577) (Li et al., 2012),  
512 was also expressed at higher levels in aphids fed on CaMV-infected plants than in aphids fed on TuYV-  
513 infected plants. A similar trend was found for the nuclear transcription factor Y subunit beta-like  
514 (g25790), which might interact with PLRV virions (DeBlasio et al., 2021) and a homolog of which  
515 belongs to the upregulated genes associated with the KEGG category “viral infectious disease” in  
516 whiteflies feeding on tomato infected with semi-persistent cucurbit yellow stunting disorder virus  
517 (genus *Crinivirus*, family *Closteroviridae*) (Kaur et al., 2019). Overall, we observed that different  
518 immune defense and detoxification pathways are affected in Myzus feeding on CaMV-infected  
519 Arabidopsis, compared to Myzus feeding on TuYV-infected Arabidopsis. This might be related to the  
520 different transmission modes of the two viruses. TuYV being circulative is expected to interact  
521 intimately with the vector and maybe even evade immune responses. On the other hand, CaMV  
522 interaction with the vector is confined to the stylet tip. Therefore, CaMV might rather modulate  
523 feeding responses. This might be illustrated by the strong activation of saliva genes (see below)  
524 following CaMV acquisition, whereas the impact of CaMV on developmental genes was comparably  
525 low. However, one needs to keep in mind that we discuss here only a subset of 90 most strongly  
526 deregulated genes in CaMV-exposed aphids compared to TuYV-exposed aphids.

527 Interestingly, in aphids feeding on CaMV-infected Arabidopsis, considerably more genes related to  
528 salivary proteins were expressed at higher levels, compared to those feeding on TuYV-infected  
529 Arabidopsis. Salivary proteins, liberated in the apoplast and plant cells or in the phloem during aphid  
530 probing and feeding activity, respectively, are excellent candidates to target defense pathways directly  
531 in the plant. Among them was the gene encoding a regucalcin (g15329) that has been identified earlier  
532 in the saliva of other aphid species (van Bel and Will, 2016). Regucalcin and other calcium-binding  
533 proteins could reduce calcium availability in the phloem, and subsequently inhibit aphid-induced  
534 calcium-mediated sieve tube occlusion in the plant, which is observed in incompatible aphid-plant  
535 interactions (Will et al., 2009). Another gene encodes the soluble calcium-activated nucleotidase 1-like  
536 isoform X2 (g12364), which has previously been annotated in whitefly salivary glands (Su et al., 2012)  
537 and is predicted to be a secretory ATP-hydrolyzing protein that could be involved in reducing the

538 concentration of extracellular ATP and suppressing plant defenses during whitefly feeding (Roux and  
539 Steinebrunner, 2007). Altogether, these aphid DEGs and the genes discussed above (see section 2b)  
540 indicate that CaMV acquisition affects aphid saliva secretion on infected Arabidopsis. To explain this  
541 finding, we propose two non-exclusive hypotheses. In the first one, the more severe phenotype of  
542 CaMV-infected Arabidopsis, compared to TuYV-infected Arabidopsis, could induce adaptive changes  
543 of the aphid secretome to allow successful settlement on the plants. In the second hypothesis, CaMV  
544 could directly alter the saliva transcriptome. Whatever the mechanisms, these deregulations could be  
545 responsible for the changes in the feeding behavior of aphids on CaMV-infected Arabidopsis plants  
546 (Chesnais et al., 2021).

### 547 **3b TuYV vs CaMV in Camelina**

548 Only 22 DEGs were found for aphids on TuYV- vs CaMV-infected Camelina, 17 expressed at higher  
549 levels in TuYV-exposed aphids and 5 expressed at higher levels in CaMV-exposed aphids (Fig. 1e). This  
550 small number of expression changes, in comparison to aphids fed on Arabidopsis, indicates strong host  
551 plant effects. They might be caused by differential host plant susceptibility to the viruses or different  
552 host-vector associations/suitability.

553 Among the genes expressed at higher levels in aphids on TuYV-infected vs aphids on CaMV-infected  
554 Camelina, we identified aphid genes related to development, such as the gene encoding a glycine-rich  
555 cell wall structural protein-like (g7216) implicated in chitin-based cuticle development (Table 4, see  
556 the complete list in Table S7). This again suggests that TuYV may target aphid performance by inducing  
557 morphological changes, for example, the formation of wings that could enhance transmission.

558 Two immune-responsive aphid DEGs on Camelina were different from those observed in aphids  
559 feeding on Arabidopsis, again denoting some host specificity. One gene (g9870), expressed at higher  
560 levels in TuYV-exposed aphids than in CaMV-exposed aphids, encodes dual oxidase maturation factor  
561 1 that is required for activation of dual oxidases and is involved in the control of reactive oxygen species  
562 (ROS) generation and signaling (De Deken et al., 2014). Its fruit fly ortholog is involved in antimicrobial  
563 defense mechanisms in the *Drosophila* intestine (Kim and Lee, 2014). Another gene (g18794),  
564 expressed at higher levels in TuYV-exposed compared to CaMV-exposed aphids, encodes a calcium  
565 release-activated calcium channel protein 1-like isoform X1 protein that regulates calcium entry into  
566 non-excitable cells and is required for proper immune function in *Drosophila* (Hou et al., 2020).

567 Finally, we observed that the gene coding for the protein THEM6-like (g24259) was expressed in TuYV-  
568 exposed aphids at a higher level than in CaMV-exposed aphids.

569 The five genes expressed at higher levels in aphids infesting CaMV-infected Camelina as compared to  
570 those infesting TuYV-infected Camelina were already discussed in previous sections of this manuscript.

571 Taken together, our results show that DEGs of aphids infesting TuYV-infected vs CaMV-infected  
572 Arabidopsis are quite different from those of aphids infesting another plant infected with these viruses,  
573 Camelina, even if these two plants have strong phylogenetical proximity. This reinforces the idea that  
574 responses of insect vectors had a strong host-virus specificity in our experimental system.

### 575 **Concluding remarks**

576 We here compared the transcriptome profiles in *Myzus* aphids infesting two host-plant species from  
577 the family *Brassicaceae* (*Arabidopsis* and *Camelina*) infected with two viruses from different families  
578 with different transmission modes (circulative persistent TuYV and non-circulative semi-persistent  
579 CaMV). We found a strong plant species-dependent response of the aphid transcriptome to infection  
580 with either of the two viruses. This is evidenced by the higher number of aphid DEGs and stronger

581 expression changes on virus-infected Arabidopsis compared to Camelina, regardless of the virus.  
582 Because the aphids were raised on Chinese cabbage before being transferred onto test plants for the  
583 experiments, a host switch effect might contribute to the observed transcriptome changes (Mathers  
584 et al., 2017; Pinheiro et al., 2017). However, we believe they are mostly neutralized by the  
585 experimental set-up, because the condition ‘aphid on mock-inoculated plant’ (Arabidopsis or  
586 Camelina) and not ‘aphid on Chinese cabbage’ was used as the reference for extracting mock vs virus  
587 transcriptome changes. Thus, we should have observed mostly (but probably not exclusively) changes  
588 due to viruses’ effects on aphids. It is worth noting that a plant transcriptome analysis has revealed a  
589 different picture (Chesnais et al., 2022a). There, TuYV altered a smaller number of plant DEGs in  
590 Arabidopsis and Camelina than did CaMV, suggesting a strong virus-specific effect on the two plant  
591 hosts. Thus, the global aphid transcriptome response to plant infection by the two viruses described  
592 here does not correlate with the global plant transcriptome response to the virus infection.

593 The amplitude of most expression changes was rather low ( $\log_2FC < |2|$ ). The most obvious reason for  
594 this is technical, i.e. the use of whole aphids for RNA extraction diluted organ-specific expression  
595 changes. So, in reality, the number of DEGs and their degree of change might be higher than reported  
596 here. Only future experiments using dissected organs or micro-dissected samples will solve this issue.  
597 Nonetheless, we extracted significant information from the data. We found that stress-related aphid  
598 genes were downregulated in Myzus on both infected plants (regardless of the virus). This suggests  
599 that both CaMV and TuYV infections facilitate the establishment of Myzus on the plants, likely by  
600 downregulating expression of plant genes implicated in anti-herbivore secondary metabolism such as  
601 the jasmonic acid pathway as shown in by us in the same experimental setup (Chesnais et al., 2022a).  
602 Apart from common transcriptomic changes induced by both viruses, our results indicate that there  
603 are also virus-specific gene expression changes, which might be related to the transmission mode.  
604 Overall, the circulative non-propagative TuYV tended to affect developmental genes, which could  
605 increase the proportion of alate (winged) aphids in TuYV viruliferous aphids, but also contribute to  
606 their locomotion, neuronal activity and lifespan, whereas the non-circulative semi-persistent (stylet-  
607 borne) CaMV had a stronger impact on feeding-related genes and in particular those related to salivary  
608 proteins. Overall, these transcriptome alterations target pathways that seem to be particularly  
609 adapted to the transmission mode of the corresponding virus. Long-term interactions of TuYV and its  
610 aphid vectors are expected and alterations of developmental genes, potentially promoting aphid  
611 dispersion at the population level (alate morphs with higher mobility and longer lifespan), could be a  
612 suitable strategy. In support of this, we have shown increased locomotory properties of wingless TuYV-  
613 carrying aphids (Chesnais et al., 2020), but whether Myzus aphids on TuYV-infected plants also form  
614 more alate morphs remains to be shown. On the other hand, the short-term association of CaMV with  
615 the tip of the aphid stylets, together with a relatively brief retention time, should favor manipulation  
616 of rather fast processes, such as initial probing and phloem feeding, encouraging fast aphid dispersion.

617 Next research steps should include functional validation of the candidate genes identified in our study  
618 for their role in viral manipulation, such as aphid behavior and performance, and consequently on viral  
619 transmission. Another future research direction would be to investigate post-transcriptional changes  
620 such as post-translational protein modifications, changes in localization, metabolite composition and  
621 quantity and the like, that could likewise impact vectors but cannot be traced by transcriptomic  
622 analyses.

623 **Tables and figures**

624 **Table 1.** Selected differentially expressed aphid genes in common for aphids feeding on both CaMV and TuYV-infected Arabidopsis and Camelina. Single lines separate genes by functional  
625 categories. The double line separates up-regulated from down-regulated genes.

| Functional category                                  | Potential effects on aphids                            | Reference(s)                                                 | Name                                       | Gene description annotation                          | Top hit Taxon             | TuYV                                       |          |                 |          | CaMV                                       |          |                 |          |
|------------------------------------------------------|--------------------------------------------------------|--------------------------------------------------------------|--------------------------------------------|------------------------------------------------------|---------------------------|--------------------------------------------|----------|-----------------|----------|--------------------------------------------|----------|-----------------|----------|
|                                                      |                                                        |                                                              |                                            |                                                      |                           | Arabidopsis thaliana                       |          | Camelina sativa |          | Arabidopsis thaliana                       |          | Camelina sativa |          |
|                                                      |                                                        |                                                              |                                            |                                                      |                           | log2FC                                     | padj     | log2FC          | padj     | log2FC                                     | padj     | log2FC          | padj     |
| Structural muscle proteins                           | Locomotion behavior                                    | (Lemke and Schnorrer, 2017)                                  | g22946                                     | Titin isoform X1                                     | <i>Acyrtosiphon pisum</i> | 0,83                                       | 4,18E-24 | 0,79            | 1,44E-06 | 1,07                                       | 2,56E-05 | 2,86            | 1,98E-44 |
|                                                      |                                                        |                                                              | g22969                                     | Titin-like, partial                                  | <i>Myzus persicae</i>     | 0,68                                       | 1,02E-02 | 2,49            | 3,39E-33 | 1,00                                       | 7,99E-35 | 0,80            | 8,59E-07 |
| Cell function - Development (neurons)                | Aphid development and behavior                         | (Ahern-Djamali et al., 1998)                                 | g6068                                      | Vasodilator-stimulated phosphoprotein-like           | <i>Sipha flava</i>        | 0,58                                       | 1,94E-03 | 1,18            | 4,38E-04 | 0,75                                       | 3,85E-05 | 0,83            | 2,47E-02 |
| Innate immunity                                      | Unknown                                                | (Ng & Xavier, 2011)                                          | g27731                                     | MATH and LRR domain-containing protein PFE0570w-like | <i>Sipha flava</i>        | 1,16                                       | 2,83E-05 | 1,11            | 1,44E-04 | 1,24                                       | 7,66E-06 | 1,05            | 3,71E-04 |
| Salivary protein                                     | Aphid feeding behavior and survival                    | (Wang et al., 2015)                                          | g22588                                     | Angiotensin-converting enzyme-like                   | <i>Myzus persicae</i>     | 0,66                                       | 2,78E-11 | 0,72            | 1,82E-02 | 0,71                                       | 2,81E-13 | 0,97            | 4,57E-04 |
| Development (Hormones)                               | Aphid wing development                                 | (Mayoral et al., 2009)                                       | g24472                                     | Farnesol dehydrogenase-like                          | <i>Myzus persicae</i>     | -0,83                                      | 2,02E-05 | -0,79           | 4,61E-05 | -1,36                                      | 2,58E-13 | -0,86           | 6,90E-06 |
| Potential saliva effector                            | Aphids feeding behavior / Hydrolysis of toxic proteins | (Mathers et al., 2017; Rispe et al., 2008; Guo et al., 2020) | g24532                                     | Cathepsin B-like cysteine proteinase 3               | <i>Myzus persicae</i>     | -0,71                                      | 5,45E-06 | -0,51           | 2,19E-04 | <i>padj &gt; 0.05 or log2FC &lt;  0.5 </i> |          |                 |          |
|                                                      |                                                        |                                                              | g8486                                      | Cathepsin B-like                                     | <i>Myzus persicae</i>     | <i>padj &gt; 0.05 or log2FC &lt;  0.5 </i> |          |                 |          | -0,52                                      | 1,23E-11 | -0,50           | 2,22E-02 |
| Immune response and Detoxification (plant defense)   | Aphid physiological response to plant defense          | (Field and Devonshire, 1998) (Brierley and Burchell, 1993)   | g22540                                     | Esterase FE4-like                                    | <i>Myzus persicae</i>     | -0,93                                      | 6,09E-28 | -0,50           | 9,43E-03 | <i>padj &gt; 0.05 or log2FC &lt;  0.5 </i> |          |                 |          |
|                                                      |                                                        |                                                              | g19915                                     | Esterase FE4-like                                    | <i>Myzus persicae</i>     | <i>padj &gt; 0.05 or log2FC &lt;  0.5 </i> |          |                 |          | -0,74                                      | 2,66E-07 | -1,03           | 1,25E-06 |
|                                                      |                                                        |                                                              | g26167                                     | UDP-glucuronosyl transferase 344L3                   | <i>Myzus persicae</i>     | -0,99                                      | 2,04E-04 | -0,87           | 7,63E-05 | -1,26                                      | 1,62E-06 | -0,78           | 4,11E-04 |
|                                                      |                                                        |                                                              | g18945                                     | UDP-glucuronosyl transferase 344E7                   | <i>Myzus persicae</i>     | -1,27                                      | 8,21E-03 | -0,86           | 6,63E-03 | -1,23                                      | 1,16E-02 | -1,23           | 1,59E-05 |
|                                                      |                                                        |                                                              | g26165                                     | UDP-glucuronosyl transferase 344L3                   | <i>Myzus persicae</i>     | -1,20                                      | 1,34E-05 | -0,63           | 8,28E-03 | <i>padj &gt; 0.05 or log2FC &lt;  0.5 </i> |          |                 |          |
|                                                      |                                                        |                                                              | g26170                                     | UDP-glucuronosyltransferase 2B2-like                 | <i>Myzus persicae</i>     | <i>padj &gt; 0.05 or log2FC &lt;  0.5 </i> |          |                 |          | -1,21                                      | 8,40E-11 | -0,61           | 1,68E-02 |
|                                                      |                                                        |                                                              | g12372                                     | Glutathione S-transferase-like                       | <i>Myzus persicae</i>     | -0,53                                      | 1,33E-08 | -0,57           | 1,50E-02 | -0,78                                      | 4,04E-18 | -0,67           | 2,67E-03 |
|                                                      |                                                        |                                                              | g24191                                     | Glutathione S-transferase-like                       | <i>Myzus persicae</i>     | <i>padj &gt; 0.05 or log2FC &lt;  0.5 </i> |          |                 |          | -0,81                                      | 2,48E-05 | -0,84           | 6,97E-04 |
|                                                      |                                                        |                                                              | g19821                                     | Probable cytochrome P450 6a13 isoform X1             | <i>Myzus persicae</i>     | -2,56                                      | 2,55E-03 | -1,34           | 1,15E-08 | <i>padj &gt; 0.05 or log2FC &lt;  0.5 </i> |          |                 |          |
| g18042                                               | Probable cytochrome P450 6a13                          | <i>Myzus persicae</i>                                        | <i>padj &gt; 0.05 or log2FC &lt;  0.5 </i> |                                                      |                           |                                            | -0,60    | 1,37E-02        | -0,82    | 1,20E-03                                   |          |                 |          |
| Protein of salivary gland cells                      | Aphid feeding behavior                                 | (Li et al., 2018)                                            | g26345                                     | Sialin-like                                          | <i>Aphis craccivora</i>   | -0,85                                      | 3,11E-04 | -0,51           | 4,71E-02 | -0,53                                      | 3,35E-02 | -0,57           | 2,05E-02 |
| Stress Response (DNA damages and genotoxic stresses) | Aphid physiological response to plant defense          | (de Vries et al., 2005)                                      | g21951                                     | CHK domain-containing protein                        | <i>Aphis craccivora</i>   | -0,60                                      | 2,14E-16 | -0,50           | 6,28E-04 | <i>padj &gt; 0.05 or log2FC &lt;  0.5 </i> |          |                 |          |
|                                                      |                                                        |                                                              | g21958                                     | CHK domain-containing protein                        | <i>Aphis craccivora</i>   | -0,69                                      | 4,55E-12 | -0,55           | 4,96E-03 | -0,92                                      | 3,54E-21 | -0,59           | 1,72E-03 |
|                                                      |                                                        |                                                              | g21950                                     | CHK domain-containing protein                        | <i>Aphis craccivora</i>   | -1,46                                      | 1,83E-08 | -0,57           | 2,70E-04 | -1,60                                      | 6,26E-10 | -0,71           | 1,80E-06 |
| Transport of trehalose                               | Unknown - Aphid physiology                             | (Kanamori et al., 2010)                                      | g14418                                     | Facilitated trehalose transporter Tret1-like         | <i>Myzus persicae</i>     | -0,93                                      | 1,54E-04 | -0,74           | 3,50E-04 | -1,40                                      | 5,46E-09 | -1,13           | 4,81E-09 |



626 **Table 2.** Selected genes commonly deregulated in aphids feeding on **a)** TuYV-infected and **b)** CaMV-infected host plants (*Arabidopsis* and *Camelina*). Single lines separate genes by functional  
627 categories.

**a) TuYV**

| Functional category             | Potential effects on aphids                | Reference(s)                                  | Name   | Gene description annotation                     | Top hit Taxon          | <i>Arabidopsis thaliana</i> |          | <i>Camelina sativa</i> |          |
|---------------------------------|--------------------------------------------|-----------------------------------------------|--------|-------------------------------------------------|------------------------|-----------------------------|----------|------------------------|----------|
|                                 |                                            |                                               |        |                                                 |                        | log2FC                      | padj     | log2FC                 | padj     |
| Saliva protein                  | Aphid feeding behavior                     | (Will et al., 2012)                           | g26473 | Putative sheath protein, partial                | <i>Sitobion avenae</i> | 0,52                        | 1,76E-11 | 0,69                   | 9,93E-03 |
| Insect neuropeptide             | Aphid behavior (sleep, sexual and feeding) | (Ayub et al., 2020)                           | g15241 | Neuropeptide SIFamide receptor-like             | <i>Myzus persicae</i>  | 0,57                        | 5,75E-03 | 1,22                   | 4,50E-03 |
| Membrane-associated transporter | Aphid development (wing)                   | (Shang et al., 2020; Jayasinghe et al., 2021) | g16568 | ATP-binding cassette sub-family G member 4-like | <i>Myzus persicae</i>  | 0,52                        | 2,15E-15 | 0,82                   | 2,76E-07 |
| Transcription factor            | Aphid development (wing)                   | (Grantham et al., 2020)                       | g24925 | Forkhead box protein O                          | <i>Myzus persicae</i>  | 0,50                        | 9,81E-04 | 1,11                   | 3,62E-06 |

628

**b) CaMV**

| Functional category                 | Potential effects on aphids           | Reference(s)                                  | Name   | Gene description annotation                          | Top hit Taxon             | <i>Arabidopsis thaliana</i> |          | <i>Camelina sativa</i> |          |
|-------------------------------------|---------------------------------------|-----------------------------------------------|--------|------------------------------------------------------|---------------------------|-----------------------------|----------|------------------------|----------|
|                                     |                                       |                                               |        |                                                      |                           | log2FC                      | padj     | log2FC                 | padj     |
| Development (multiple pathways)     | Aphid behavior and development        |                                               | g19210 | Glucose dehydrogenase [FAD, quinone]-like isoform X1 | <i>Myzus persicae</i>     | 0,87                        | 6,77E-10 | 1,20                   | 7,11E-04 |
|                                     |                                       |                                               | g19209 | Glucose dehydrogenase [FAD, quinone]-like            | <i>Myzus persicae</i>     | 0,51                        | 6,21E-03 | 0,98                   | 8,07E-04 |
| Structural protein                  | Aphid development - Virus interaction | (Deshoux et al., 2018)                        | g21498 | RR-2 cuticle protein 3, partial                      | <i>Myzus persicae</i>     | 1,03                        | 1,21E-10 | 0,85                   | 9,89E-04 |
| Saliva protein                      | Aphid feeding behavior                | (Huang et al., 2017; Shangguan et al., 2018)  | g27683 | Mucin-2-like                                         | <i>Myzus persicae</i>     | 1,01                        | 9,40E-42 | 1,54                   | 9,71E-06 |
| Metalloproteases - Secreted protein | Aphid feeding behavior - Digestion    | (Sterchi et al., 2008)                        | g7709  | Astacin-like                                         | <i>Myzus persicae</i>     | 1,13                        | 1,26E-09 | 0,93                   | 1,69E-02 |
| Saliva protein - Lipase activity    | Aphid feeding behavior                | (Chaudhary et al., 2015)                      | g16515 | Pancreatic lipase-related protein 2-like             | <i>Myzus persicae</i>     | -0,71                       | 8,11E-14 | -0,50                  | 8,80E-03 |
| Saliva protein                      | Aphid feeding behavior                | (Enders et al., 2015; Champagne et al., 1995) | g22531 | Protein 5NUC isoform X1                              | <i>Acyrtosiphon pisum</i> | -0,62                       | 4,17E-02 | -0,70                  | 6,29E-04 |
| Carbohydrate metabolism             | Aphid metabolism                      | (Qin et al., 2018)                            | g20667 | Sugar transporter SWEET1-like                        | <i>Myzus persicae</i>     | -0,53                       | 1,87E-08 | -0,54                  | 1,18E-02 |

629

630 **Table 3.** Selected genes differentially expressed in aphids feeding on TuYV-infected vs CaMV-infected Arabidopsis. **a)** up-regulated on TuYV-infected Arabidopsis and **b)** up-regulated on CaMV-  
631 infected Arabidopsis. Single lines separate genes by functional categories.

**a)**

| Functional category                                                                                                           | Potential effects on aphids                   | Reference(s)                                                                                        | Name   | Gene description annotation                     | Top hit Taxon               | Counts |      |      |        |          |
|-------------------------------------------------------------------------------------------------------------------------------|-----------------------------------------------|-----------------------------------------------------------------------------------------------------|--------|-------------------------------------------------|-----------------------------|--------|------|------|--------|----------|
|                                                                                                                               |                                               |                                                                                                     |        |                                                 |                             | Mock   | TuYV | CaMV | log2FC | padj     |
| Chitin degradation/reconstruction                                                                                             | Aphid survival, molting or development        | (Arakane and Muthukrishnan, 2010)                                                                   | g5369  | Chitinase-like protein 4                        | <i>Myzus persicae</i>       | 56     | 77   | 37   | 1,06   | 3,78E-02 |
|                                                                                                                               |                                               |                                                                                                     | g10419 | Chitinase-like protein PB1E7.04c                | <i>Rhopalosiphum maidis</i> | 270    | 354  | 220  | 0,68   | 1,49E-02 |
| Insulin-like insect hormone<br>Developmental protein (embryo, tracheal)<br>Hormone / Neurotransmitter<br>Transcription factor | Development (wing)                            | (Ding et al., 2017)<br>(Weihe et al., 2004)<br>(Wang et al. 2016)<br>(Campbell and Tomlinson, 1998) | g7214  | Bombyxin C-2-like                               | <i>Myzus persicae</i>       | 274    | 274  | 174  | 0,65   | 2,25E-02 |
|                                                                                                                               |                                               |                                                                                                     | g24564 | Zinc finger protein Elbow-like                  | <i>Myzus persicae</i>       | 954    | 1305 | 880  | 0,57   | 4,52E-03 |
|                                                                                                                               |                                               |                                                                                                     | g15146 | Octopamine receptor Oamb                        | <i>Myzus persicae</i>       | 64     | 117  | 50   | 1,21   | 8,65E-03 |
|                                                                                                                               |                                               |                                                                                                     | g5303  | Homeotic protein distal-less-like               | <i>Myzus persicae</i>       | 279    | 416  | 267  | 0,63   | 2,79E-03 |
| Immune response and<br>Detoxification (plant defense)                                                                         | Aphid physiological response to plant defense | (Field and Devonshire, 1998) (Brierley and Burchell, 1993)                                          | g21619 | UDP-glucuronosyl transferase 344D9              | <i>Myzus persicae</i>       | 119    | 150  | 48   | 1,65   | 4,00E-03 |
|                                                                                                                               |                                               |                                                                                                     | g26170 | UDP-glucuronosyltransferase 2B2-like            | <i>Myzus persicae</i>       | 6090   | 4348 | 2641 | 0,72   | 2,50E-03 |
|                                                                                                                               |                                               |                                                                                                     | g23179 | UDP-glucuronosyltransferase 2C1-like isoform X1 | <i>Myzus persicae</i>       | 610    | 374  | 228  | 0,72   | 2,48E-02 |
|                                                                                                                               |                                               |                                                                                                     | g21618 | UDP-glucuronosyltransferase 2B9-like isoform X9 | <i>Myzus persicae</i>       | 1109   | 495  | 335  | 0,56   | 3,10E-02 |

632

**b)**

| Functional category                      | Potential effects on aphids           | Reference(s)                                                                     | Name   | Gene description annotation                              | Top hit Taxon             | Counts |       |      |        |          |
|------------------------------------------|---------------------------------------|----------------------------------------------------------------------------------|--------|----------------------------------------------------------|---------------------------|--------|-------|------|--------|----------|
|                                          |                                       |                                                                                  |        |                                                          |                           | Mock   | CaMV  | TuYV | log2FC | padj     |
| Structural protein                       | Aphid development - Virus interaction | (Deshoux et al., 2018)                                                           | g21495 | Cuticle protein 7-like                                   | <i>Myzus persicae</i>     | 125    | 152   | 60   | 1,34   | 8,60E-05 |
|                                          |                                       |                                                                                  | g27579 | Cuticular protein-like precursor                         | <i>Acyrtosiphon pisum</i> | 2106   | 4663  | 2153 | 1,12   | 2,34E-06 |
|                                          |                                       |                                                                                  | g21493 | Cuticle protein-like                                     | <i>Myzus persicae</i>     | 2075   | 2794  | 1558 | 0,84   | 1,33E-10 |
|                                          |                                       |                                                                                  | g21498 | RR2 cuticle protein 3, partial                           | <i>Myzus persicae</i>     | 4063   | 8289  | 5229 | 0,67   | 7,25E-04 |
| Cuticle synthesis                        | Aphid development - Virus interaction | (Blomquist and Ginzler, 2021)                                                    | g11235 | Fatty acyl-CoA reductase wat-like isoform X1             | <i>Myzus persicae</i>     | 89     | 240   | 130  | 0,89   | 2,94E-04 |
| Membrane<br>Melanization immune response | Immune system                         | (Patton et al., 2021a)<br>(Nam et al., 2012)                                     | g10551 | Histidine-rich glycoprotein-like                         | <i>Myzus persicae</i>     | 2176   | 3132  | 2060 | 0,61   | 1,28E-13 |
|                                          |                                       |                                                                                  | g21180 | Serine protease Hayan                                    | <i>Acyrtosiphon pisum</i> | 3376   | 6374  | 4356 | 0,55   | 1,60E-12 |
| Antimicrobial peptide                    | Immune system                         | (Li et al., 2012)                                                                | g27576 | Repetitive proline-rich cell wall protein 2-like         | <i>Myzus persicae</i>     | 3286   | 4109  | 1615 | 1,35   | 4,58E-09 |
| Transcription factor                     |                                       |                                                                                  | g27577 | Repetitive proline-rich cell wall protein 2-like         | <i>Myzus persicae</i>     | 7450   | 10736 | 6467 | 0,73   | 1,74E-11 |
| Saliva protein                           | Aphid feeding behavior                | (DeBlasio et al., 2021)<br>(Will et al., 2009)<br>(Roux and Steinebrunner, 2007) | g25790 | Nuclear transcription factor Y subunit beta-like         | <i>Myzus persicae</i>     | 10302  | 14330 | 9022 | 0,67   | 1,16E-03 |
|                                          |                                       |                                                                                  | g15329 | Regucalcin-like isoform X1                               | <i>Myzus persicae</i>     | 3804   | 10859 | 5495 | 0,98   | 9,82E-05 |
|                                          |                                       |                                                                                  | g12364 | Soluble calcium-activated nucleotidase 1-like isoform X2 | <i>Myzus persicae</i>     | 9335   | 5354  | 2971 | 0,85   | 1,32E-02 |

633

634

635

636 **Table 4.** Selected genes upregulated in aphids feeding on TuYV-infected vs CaMV-infected Camelina. Single lines separate genes by functional categories.

| Functional category               | Potential effects on aphids | Reference(s)            | Name   | Gene description annotation                                         | Top hit Taxon         | Counts |      |      | log2FC | padj     |
|-----------------------------------|-----------------------------|-------------------------|--------|---------------------------------------------------------------------|-----------------------|--------|------|------|--------|----------|
|                                   |                             |                         |        |                                                                     |                       | Mock   | TuYV | CaMV |        |          |
| Chitin-based cuticle development  | Aphid development           |                         | g7216  | Glycine-rich cell wall structural protein-like                      | <i>Myzus persicae</i> | 3672   | 4861 | 3099 | 0,65   | 1,74E-02 |
| Control of ROS and signaling      | Immune system / Defense     | (De Deken et al., 2014) | g9870  | Dual oxidase maturation factor 1                                    | <i>Myzus persicae</i> | 1699   | 2215 | 1448 | 0,61   | 2,88E-03 |
| Regulates calcium entry           |                             | (Hou et al., 2020)      | g18794 | Calcium release-activated calcium channel protein 1-like isoform X1 | <i>Myzus persicae</i> | 1714   | 2254 | 1695 | 0,41   | 3,13E-02 |
| Hydrolase / Amino acid metabolism | Aphid metabolism            |                         | g24259 | Protein THEM6-like (Thioesterase-like superfamily)                  | <i>Myzus persicae</i> | 1060   | 1205 | 779  | 0,63   | 1,30E-02 |

637

638

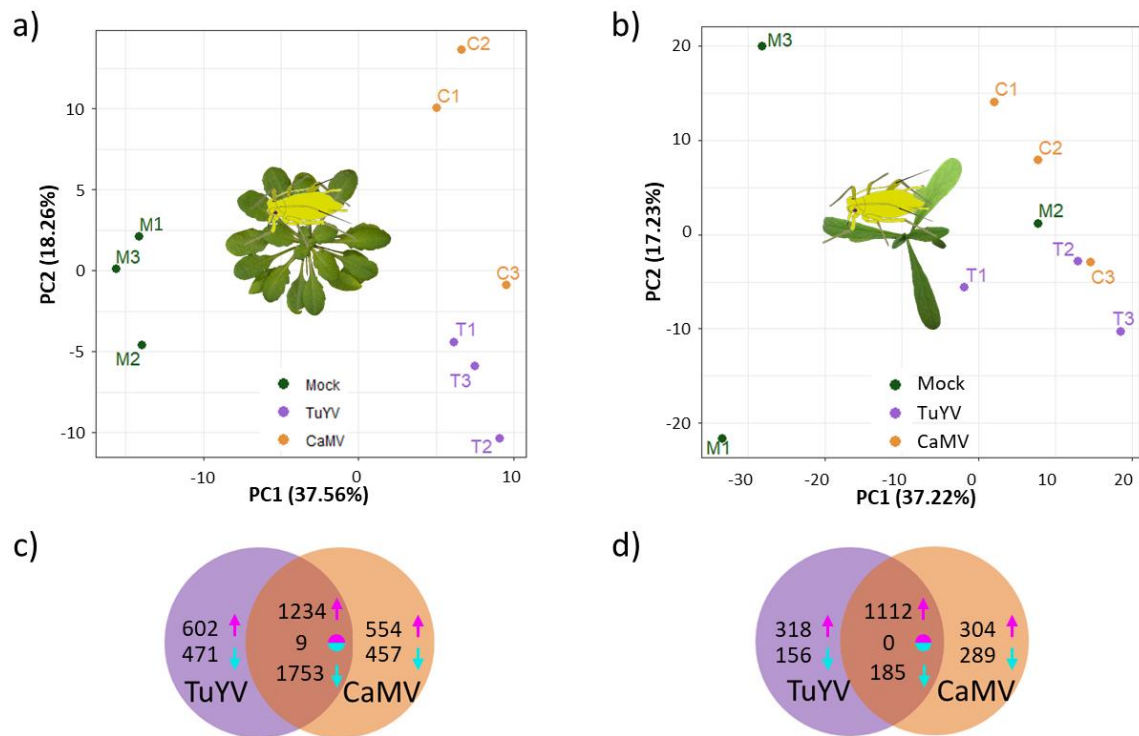

| e)                    | Arabidopsis   |               |               | Camelina      |               |               |
|-----------------------|---------------|---------------|---------------|---------------|---------------|---------------|
|                       | TuYV vs. Mock | CaMV vs. Mock | TuYV vs. CaMV | TuYV vs. Mock | CaMV vs. Mock | TuYV vs. CaMV |
| n° DEGs               | 4060          | 3998          | 380           | 1771          | 1890          | 22            |
| (%DEGs/All genes)     | (14.24%)      | (14.02%)      | (1.33%)       | (6.21%)       | (6.63%)       | (<0.01%)      |
| n° DEGs upregulated   | 1836          | 1797          | 154           | 1430          | 1416          | 17            |
| (%up/DEGs)            | (45.22%)      | (44.95%)      | (40.53%)      | (80.75%)      | (74.92%)      | (77.27%)      |
| n° DEGs downregulated | 2224          | 2201          | 226           | 341           | 474           | 5             |
| (%down/DEGs)          | (54.78%)      | (55.05%)      | (59.47%)      | (19.25%)      | (25.08%)      | (22,73%)      |
| n° enriched GO terms  | 31            | 37            | 5             | 8             | 3             | 0             |

639

640

641

642

643

644

645

646

647

648

649

**Figure 1.** Analysis of the transcriptome profiles of aphids fed on mock-inoculated vs TuYV- and CaMV-infected plants. (a-b) Principal component analysis of three biological replicates for each condition of *Myzus persicae* feeding on (a) *Arabidopsis thaliana* and (b) *Camelina sativa*. The dots of the same color correspond to the biological replicates for each condition. The mock 2 (M2) *Camelina* sample was excluded from the analysis because it did not cluster with the other two replicates. (c-d) Venn diagrams presenting the number of differentially expressed genes (DEGs) in aphids fed on TuYV- and CaMV-infected *Arabidopsis* (c) and *Camelina* (d), compared to respective mock-inoculated controls. Magenta arrows: number of up-regulated genes, cyan arrows: number of down-regulated genes and two-color circles: inversely regulated genes (up-regulated genes in one virus-infected modality and down-regulated in the other virus-infected modality). e) The number of DEGs and enriched GO categories in aphids fed on TuYV and CaMV-infected plants vs mock controls as well as on TuYV- vs CaMV-infected plants.

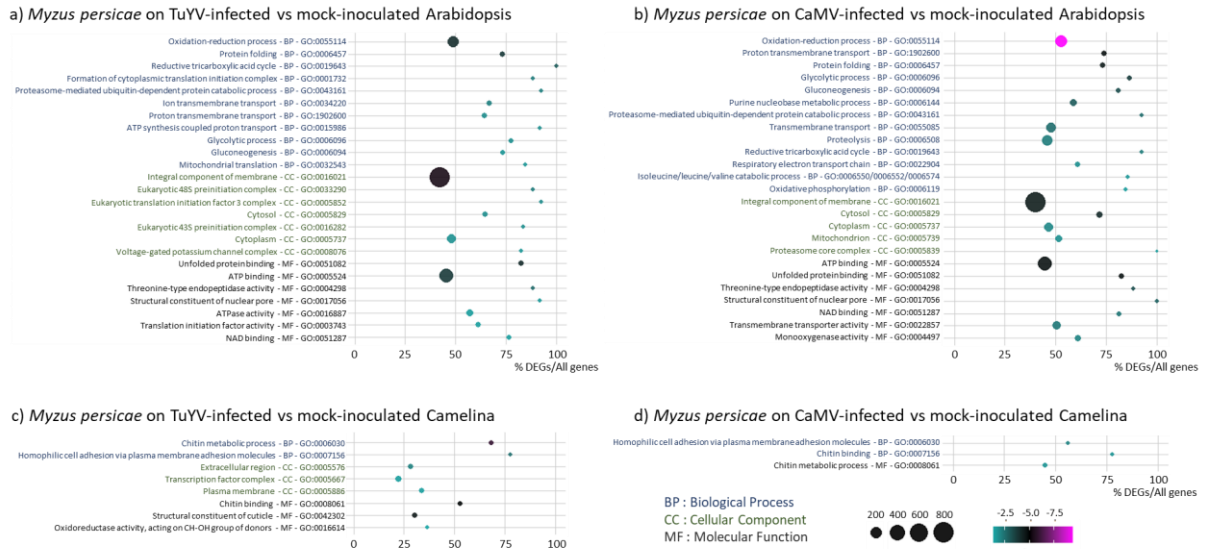

650  
651  
652  
653  
654  
655  
656  
657  
658  
659

**Figure 2.** Gene ontology (GO) analysis of differentially expressed genes in *Myzus persicae* feeding on TuYV- and CaMV-infected Arabidopsis and Camelina. a) *Myzus persicae* on TuYV-infected vs mock-inoculated Arabidopsis, b) *Myzus persicae* on CaMV-infected vs mock-inoculated Arabidopsis, c) *Myzus persicae* on TuYV-infected vs mock-inoculated Camelina, and d) *Myzus persicae* on CaMV-infected vs mock-inoculated Camelina. The deregulated processes and the corresponding GO categories and IDs are specified in the vertical axis. For each GO category (BP: Biological Process, CC: Cellular Component, and MF: Molecular Function), the GO terms/processes are sorted according to decreasing log<sub>2</sub> (1/p-value), also indicated by the color of each spot, to place the most significantly enriched GOs on top of the graph. The absolute number of DEGs that matched the GO term is indicated by the size of each spot, whereas the horizontal axis shows the percentage of DEGs belonging to the GO term.

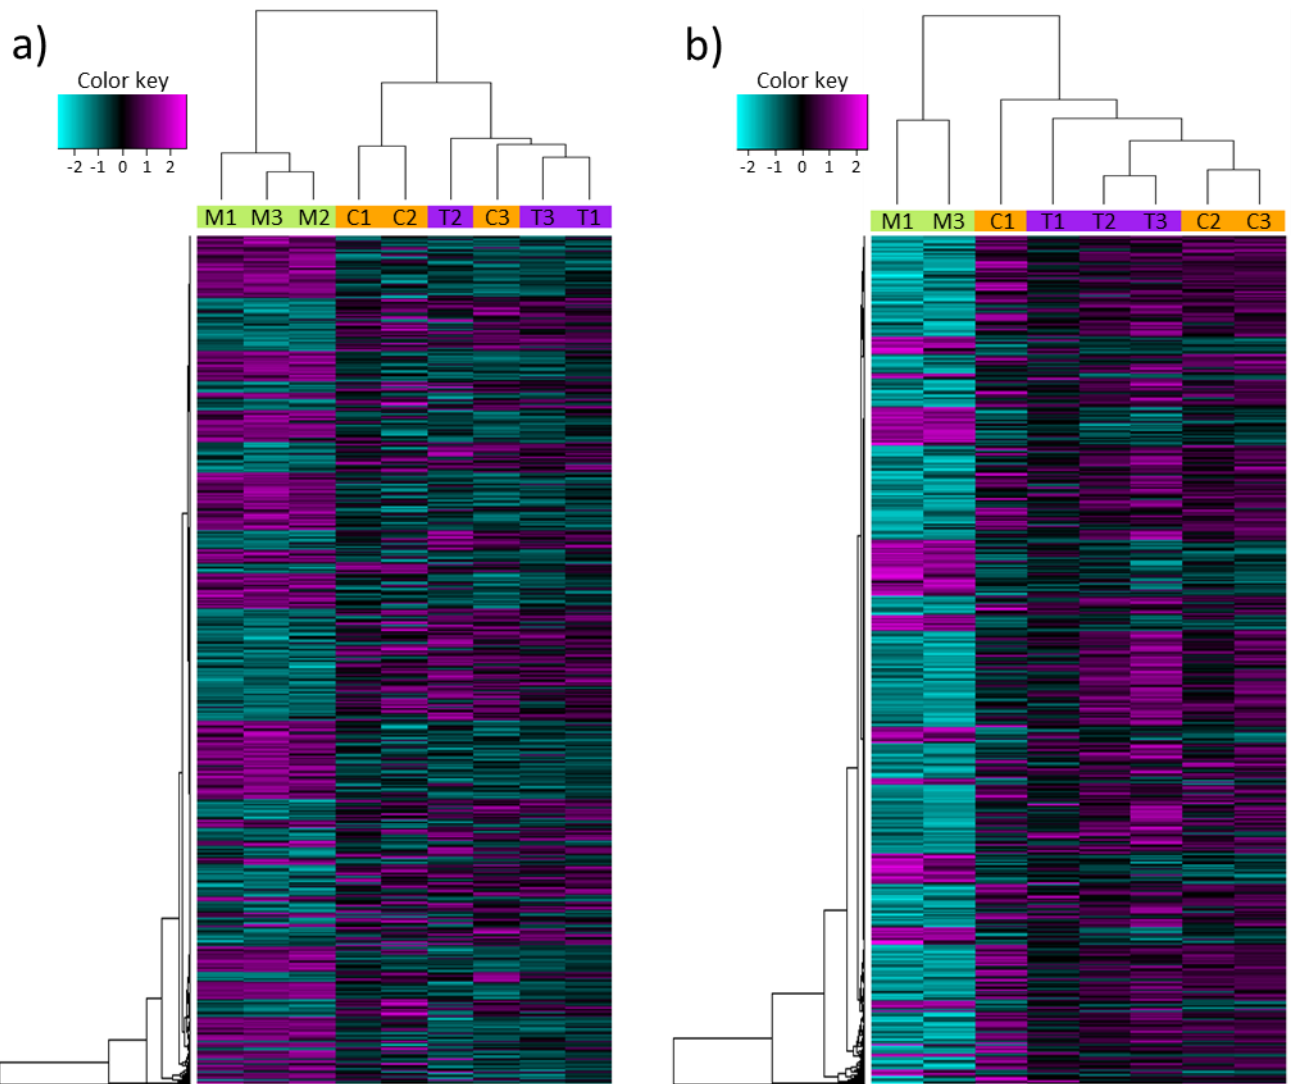

660

661 **Figure 3.** Hierarchical clustering of all differentially expressed genes (DEGs) in *Myzus persicae* feeding on CaMV- and TuYV-  
662 infected *Arabidopsis thaliana* (a) and *Camelina sativa* (b), compared to mock-inoculated control plants (Mock-inoculated [M],  
663 TuYV-infected [T] and CaMV-infected [C]) (Supplementary Dataset S1). The color key scale displays the row Z-score  
664 (normalized counts) from -2 to +2 as a gradient from cyan to magenta.

665

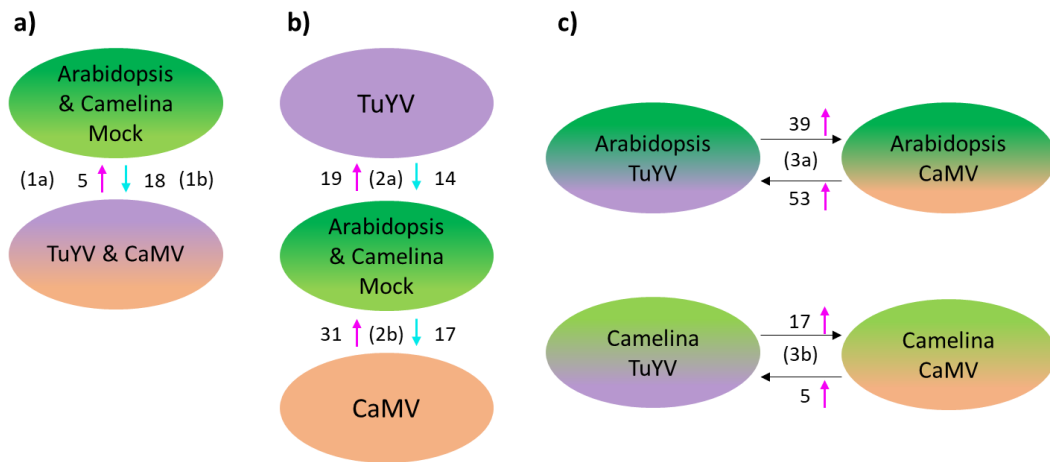

666

667 **Figure 4.** Summarizing figure presenting the number of differentially expressed aphid genes ( $\log_2FC > 0.5$  or  $< 0.5$ ) discussed  
668 in each subsection of the discussion (1a, 1b, 2a, 2b, 3a, 3b). a) differentially expressed aphid genes in common for all  
669 conditions, b) virus-specific aphid DEGs common on both host-plants, and c) host plant-specific aphid DEGs for TuYV vs CaMV.  
670 Magenta arrows indicate the number of upregulated genes and the cyan arrows the number of downregulated genes.

## 671 **Acknowledgments**

672 We thank Claire Villeroy for aphid rearing and the experimental unit of INRAE Grand Est – Colmar  
673 (UEAV) for help with plant production and Nathalie Laboureau for technical assistance in total RNA  
674 extraction and analysis.

## 675 **Funding**

676 This work was supported by a public grant overseen by the French National Research Agency (ANR)  
677 (reference: ROME ANR-18-CE20-0017-01). Dr. Quentin Chesnais was supported by Région Grand Est  
678 (Soutien aux jeunes chercheurs, reference: 18\_GE5\_013). The funding sources had no role in the study  
679 design; in the collection, analysis, and interpretation of data; in the writing of the report; and in the  
680 decision to submit the article for publication.

## 681 **Conflict of interest disclosure**

682 The authors declare no conflict of interest.

## 683 **Author contributions**

684 Conceptualization, Q.C., V.B., M.P. and M.D.; methodology, Q.C., V.G. and M.D.; software, Q.C., A.V.  
685 and C.R.; validation, Q.C. and V.G.; formal analysis, Q.C., A.V., C.R., M.V. and M.D.; investigation, Q.C.  
686 and V.G.; Data curation, Q.C., A.V. and C.R.; Writing – Original Draft Preparation, Q.C., M.P. and M.D.;  
687 Writing – Review & Editing, Q.C., A.V., C.R., M.V., V.B., M.P. and M.D.; Visualization, Q.C.; supervision,  
688 M.P. and M.D.; project administration, M.D.; funding acquisition, M.P. and M.D.

## 689 **Data, script and code availability**

690 The raw RNA-seq data are available under project number PRJEB54781 at the European Nucleotide  
691 Archive (<https://www.ebi.ac.uk/ena/browser/view/PRJEB54781>). The data used to create Figures 1  
692 and 3 and Tables 1 through 4 are contained in the supplementary data set deposited on BioRxiv  
693 (<https://doi.org/10.1101/2022.07.18.500449>). The scripts used to process data are listed in the  
694 ‘Materials and methods’ section, subsection ‘Raw data processing and quality control for  
695 transcriptome profiling’.

## 696 **Supplementary information**

697 The following supplementary data are available on doi: <https://doi.org/10.1101/2022.07.18.500449>:

698 **Table S1.** Aligned reads for transcriptome profiling

699 **Table S2.** Oligonucleotides used for RT-qPCR

700 **Table S3.** Complete list of deregulated aphid genes in common for aphids feeding on both CaMV and  
701 TuYV-infected Arabidopsis and Camelina.

702 **Table S4.** Complete list of genes commonly deregulated in aphids feeding on CaMV-infected host  
703 plants (Arabidopsis and Camelina) ( $p_{adj} < 0.05$  and  $\log_2FC > |0.5|$ ).

704 **Table S5.** Complete list of genes upregulated in aphids feeding on TuYV-infected vs. CaMV-infected  
705 Arabidopsis ( $p_{adj} < 0.05$  and  $\log_2FC > |0.5|$ ).

706 **Table S6.** Complete list of genes upregulated in aphids feeding on CaMV-infected vs. TuYV-infected  
707 Arabidopsis ( $p_{adj} < 0.05$  and  $\log_2FC > |0.5|$ ).



708 **Table S7.** Complete lists of genes upregulated in aphids feeding on CaMV-infected vs. TuYV-infected  
709 Camelina and of genes upregulated in aphids feeding on TuYV-infected vs. CaMV-infected Camelina  
710 ( $\text{padj} < 0.05$  and  $\log_2\text{FC} > |0.5|$ ).

711 **Figure S1.** Quantitative reverse transcription PCR (RT-qPCR) validation of differentially expressed genes  
712 (DEGs) determined by Illumina RNA-seq profiling of the aphid transcriptome.

713 **Figure S2.** Kyoto Encyclopedia of Genes and Genomes (KEGG) pathways enrichment analysis of DEGs  
714 ( $\log_2\text{FC} > 1$ ) in *Myzus persicae* in response to TuYV or CaMV infection in Arabidopsis or Camelina plants.

715 **Dataset S1.** RNA-seq data used to establish the heatmap.

## 716 References

- 717 Afgan, E., Baker, D., van den Beek, M., Blankenberg, D., Bouvier, D., Čech, M., et al. (2016) The Galaxy platform for accessible,  
718 reproducible and collaborative biomedical analyses: 2016 update. *Nucleic Acids Research*, 44, W3–W10.  
719 <https://doi.org/10.1093/nar/gkw343>.
- 720 Ahern-Djamali, S.M., Comer, A.R., Bachmann, C., Kastenmeier, A.S., Reddy, S.K., Beckerle, M.C., et al. (1998) Mutations in  
721 *Drosophila* Enabled and Rescue by Human Vasodilator-stimulated Phosphoprotein (VASP) Indicate Important  
722 Functional Roles for Ena/VASP Homology Domain 1 (EVH1) and EVH2 Domains. *Molecular Biology of the Cell*, 9,  
723 2157–2171. <https://doi.org/10.1091/mbc.9.8.2157>.
- 724 Alvarez, A.E., Garzo, E., Verbeek, M., Vosman, B., Dicke, M. & Tjallingii, W.F. (2007) Infection of potato plants with potato  
725 leafroll virus changes attraction and feeding behaviour of *Myzus persicae*. *Entomologia Experimentalis et Applicata*,  
726 125, 135–144. <https://doi.org/10.1111/j.1570-7458.2007.00607.x>.
- 727 Arakane, Y. & Muthukrishnan, S. (2010) Insect chitinase and chitinase-like proteins. *Cellular and Molecular Life Sciences*, 67,  
728 201–216. <https://doi.org/10.1007/s00018-009-0161-9>.
- 729 Ayub, M., Hermiz, M., Lange, A.B. & Orchard, I. (2020) SIFamide Influences Feeding in the Chagas Disease Vector, *Rhodnius*  
730 *prolixus*. *Frontiers in Neuroscience*, 14, 134. <https://doi.org/10.3389/fnins.2020.00134>.
- 731 Bel, A.J.E. van & Will, T. (2016) Functional Evaluation of Proteins in Watery and Gel Saliva of Aphids. *Frontiers in Plant Science*,  
732 7, 1840. <https://doi.org/10.3389/fpls.2016.01840>.
- 733 Bhargava, K.S. (1951) Some Properties of Four Strains of Cucumber Mosaic Virus. *Annals of Applied Biology*, 38, 377–388.  
734 <https://doi.org/10.1111/j.1744-7348.1951.tb07812.x>.
- 735 Blomquist, G.J. & Ginzel, M.D. (2021) Chemical Ecology, Biochemistry, and Molecular Biology of Insect Hydrocarbons. *Annual*  
736 *Review of Entomology*, 66, 45–60. <https://doi.org/10.1146/annurev-ento-031620-071754>.
- 737 Bosque-Pérez, N.A. & Eigenbrode, S.D. (2011) The influence of virus-induced changes in plants on aphid vectors: insights from  
738 luteovirus pathosystems. *Virus Research*, 159, 201–205. <https://doi.org/10.1016/j.virusres.2011.04.020>.
- 739 Brault, V., Tanguy, S., Reinbold, C., Le Trionnaire, G., Arneodo, J., Jaubert-Possamai, S., et al. (2010) Transcriptomic analysis  
740 of intestinal genes following acquisition of pea enation mosaic virus by the pea aphid *Acyrtosiphon pisum*. *Journal*  
741 *of General Virology*, 91, 802–808. <https://doi.org/10.1099/vir.0.012856-0>.
- 742 Brierley, C.H. & Burchell, B. (1993) Human UDP-glucuronosyl transferases: chemical defence, jaundice and gene therapy.  
743 *BioEssays: News and Reviews in Molecular, Cellular and Developmental Biology*, 15, 749–754.  
744 <https://doi.org/10.1002/bies.950151108>.
- 745 Caicedo, P.A., Serrato, I.M., Sim, S., Dimopoulos, G., Coatsworth, H., Lowenberger, C., et al. (2019) Immune response-related  
746 genes associated to blocking midgut dengue virus infection in *Aedes aegypti* strains that differ in susceptibility.  
747 *Insect Science*, 26, 635–648. <https://doi.org/10.1111/1744-7917.12573>.
- 748 Campbell, G. & Tomlinson, A. (1998) The roles of the homeobox genes *aristaless* and *Distal-less* in patterning the legs and  
749 wings of *Drosophila*. *Development (Cambridge, England)*, 125, 4483–4493.  
750 <https://doi.org/10.1242/dev.125.22.4483>.

- 751 Carmo-Sousa, M., Moreno, A., Plaza, M., Garzo, E. & Fereres, A. (2016) Cucurbit aphid-borne yellows virus (CABYV) modifies  
752 the alighting, settling and probing behaviour of its vector *Aphis gossypii* favouring its own spread. *Annals of Applied*  
753 *Biology*, 169, 284–297. <https://doi.org/10.1111/aab.12300>.
- 754 Cassone, B.J., Michel, A.P., Stewart, L.R., Bansal, R., Mian, M.A.R. & Redinbaugh, M.G. (2014) Reduction in Fecundity and  
755 Shifts in Cellular Processes by a Native Virus on an Invasive Insect. *Genome Biology and Evolution*, 6, 873–885.  
756 <https://doi.org/10.1093/gbe/evu057>.
- 757 Champagne, D.E., Smartt, C.T., Ribeiro, J.M. & James, A.A. (1995) The salivary gland-specific apyrase of the mosquito *Aedes*  
758 *aegypti* is a member of the 5'-nucleotidase family. *Proceedings of the National Academy of Sciences of the United*  
759 *States of America*, 92, 694–698. <https://doi.org/10.1073/pnas.92.3.694>.
- 760 Chaudhary, R., Atamian, H.S., Shen, Z., Briggs, S.P. & Kaloshian, I. (2015) Potato aphid salivary proteome: enhanced salivation  
761 using resorcinol and identification of aphid phosphoproteins. *Journal of Proteome Research*, 14, 1762–1778.  
762 <https://doi.org/10.1021/pr501128k>.
- 763 Chen, C.-Y. & Mao, Y.-B. (2020) Research advances in plant–insect molecular interaction. *F1000Res* 9, 1.  
764 <https://doi.org/10.12688/f1000research.21502.1>
- 765 Chesnais, Q., Caballero Vidal, G., Coquelle, R., Yvon, M., Mauck, K., Brault, V., et al. (2020) Post-acquisition effects of viruses  
766 on vector behavior are important components of manipulation strategies. *Oecologia*, 194, 429–440.  
767 <https://doi.org/10.1007/s00442-020-04763-0>.
- 768 Chesnais, Q., Couty, A., Uzest, M., Brault, V. & Ameline, A. (2019) Plant infection by two different viruses induce contrasting  
769 changes of vectors fitness and behavior. *Insect Science*, 26, 86–96. <https://doi.org/10.1111/1744-7917.12508>.
- 770 Chesnais, Q., Golyaev, V., Velt, A., Rustenholz, C., Brault, V., Pooggin, M., et al. (2022a) Comparative Plant Transcriptome  
771 Profiling of *Arabidopsis thaliana* Col-0 and *Camelina sativa* var. Celine Infested with *Myzus persicae* Aphids Acquiring  
772 Circulative and Noncirculative Viruses Reveals Virus- and Plant-Specific Alterations Relevant to Aphid Feeding  
773 Behavior and Transmission. *Microbiology spectrum*, 10(4), e00136-22. [https://doi.org/10.1128/spectrum.00136-](https://doi.org/10.1128/spectrum.00136-22)  
774 [22](https://doi.org/10.1128/spectrum.00136-22).
- 775 Chesnais, Q., Sun, P. & Mauck, K.E. (2022b) Advanced infections by cucurbit yellow stunting disorder virus encourage whitefly  
776 vector colonization while discouraging non-vector aphid competitors. *Journal of Pest Science*, 95, 231–247.  
777 <https://doi.org/10.1007/s10340-021-01394-z>.
- 778 Chesnais, Q., Verdier, M., Burckbuchler, M., Brault, V., Pooggin, M. & Drucker, M. (2021) Cauliflower mosaic virus protein P6-  
779 TAV plays a major role in alteration of aphid vector feeding behaviour but not performance on infected *Arabidopsis*.  
780 *Molecular Plant Pathology*, 22, 911–920. <https://doi.org/10.1111/mpp.13069>.
- 781 Claudel, P., Chesnais, Q., Fouché, Q., Krieger, C., Halter, D., Bogaert, F., et al. (2018) The Aphid-Transmitted Turnip yellows  
782 virus Differentially Affects Volatiles Emission and Subsequent Vector Behavior in Two Brassicaceae Plants.  
783 *International Journal of Molecular Sciences*, 19. <https://doi.org/10.3390/ijms19082316>.
- 784 Dáder, B., Then, C., Berthelot, E., Ducouso, M., Ng, J.C.K. & Drucker, M. (2017) Insect transmission of plant viruses:  
785 Multilayered interactions optimize viral propagation. *Insect Science*, 24, 929–946. [https://doi.org/10.1111/1744-](https://doi.org/10.1111/1744-7917.12470)  
786 [7917.12470](https://doi.org/10.1111/1744-7917.12470).
- 787 Day, M. & Irzykiewicz, H. (1954) On the Mechanism of Transmission of Non-Persistent Phytopathogenic Viruses by Aphids.  
788 *Australian Journal of Biological Sciences*, 7, 251. <https://doi.org/10.1071/B19540251>.
- 789 De Deken, X., Corvilain, B., Dumont, J.E. & Miot, F. (2014) Roles of DUOX-mediated hydrogen peroxide in metabolism, host  
790 defense, and signaling. *Antioxidants & Redox Signaling*, 20, 2776–2793. <https://doi.org/10.1089/ars.2013.5602>.
- 791 DeBlasio, S.L., Wilson, J.R., Tamborindéguy, C., Johnson, R.S., Pinheiro, P.V., MacCoss, M.J., et al. (2021) Affinity Purification–  
792 Mass Spectrometry Identifies a Novel Interaction between a Polerovirus and a Conserved Innate Immunity Aphid  
793 Protein that Regulates Transmission Efficiency. *Journal of Proteome Research*, 20, 3365–3387.  
794 <https://doi.org/10.1021/acs.jproteome.1c00313>.
- 795 Decrem, Y., Beaufays, J., Blasioli, V., Lahaye, K., Brossard, M., Vanhamme, L., et al. (2008) A family of putative  
796 metalloproteases in the salivary glands of the tick *Ixodes ricinus*. *The FEBS journal*, 275, 1485–1499.  
797 <https://doi.org/10.1111/j.1742-4658.2008.06308.x>.

- 798 Deshoux, M., Monsion, B. & Uzest, M. (2018) Insect cuticular proteins and their role in transmission of phytoviruses. *Current*  
799 *Opinion in Virology*, 33, 137–143. <https://doi.org/10.1016/j.coviro.2018.07.015>.
- 800 Dietzgen, R.G., Mann, K.S. & Johnson, K.N. (2016) Plant Virus-Insect Vector Interactions: Current and Potential Future  
801 Research Directions. *Viruses*, 8. <https://doi.org/10.3390/v8110303>.
- 802 Ding, B.-Y., Shang, F., Zhang, Q., Xiong, Y., Yang, Q., Niu, J.-Z., et al. (2017) Silencing of Two Insulin Receptor Genes Disrupts  
803 Nymph-Adult Transition of Alate Brown Citrus Aphid. *International Journal of Molecular Sciences*, 18, E357.  
804 <https://doi.org/10.3390/ijms18020357>.
- 805 Ding, T.-B., Li, J., Chen, E.-H., Niu, J.-Z. & Chu, D. (2019) Transcriptome Profiling of the Whitefly *Bemisia tabaci* MED in  
806 Response to Single Infection of Tomato yellow leaf curl virus, Tomato chlorosis virus, and Their Co-infection.  
807 *Frontiers in Physiology*, 10, 302. <https://doi.org/10.3389/fphys.2019.00302>
- 808 Enders, L.S., Bickel, R.D., Brisson, J.A., Heng-Moss, T.M., Siegfried, B.D., Zera, A.J., et al. (2015) Abiotic and Biotic Stressors  
809 Causing Equivalent Mortality Induce Highly Variable Transcriptional Responses in the Soybean Aphid. *G3*  
810 *Genes/Genomes/Genetics*, 5, 261–270. <https://doi.org/10.1534/g3.114.015149>.
- 811 Fereres, A. & Moreno, A. (2009) Behavioural aspects influencing plant virus transmission by homopteran insects. *Virus*  
812 *Research*, 141, 158–168. <https://doi.org/10.1016/j.virusres.2008.10.020>.
- 813 Field, M.L. & Devonshire, L.A. (1998) Evidence that the E4 and FE4 esterase genes responsible for insecticide resistance in the  
814 aphid *Myzus persicae* (Sulzer) are part of a gene family. *Biochemical Journal*, 330, 169–173.  
815 <https://doi.org/10.1042/bj3300169>.
- 816 Gamage, S.M.K.W., Rotenberg, D., Schneeweis, D.J., Tsai, C.-W. & Dietzgen, R.G. (2018) Transcriptome-wide responses of adult  
817 melon thrips (*Thrips palmi*) associated with capsicum chlorosis virus infection. *PLOS ONE*, 13, e0208538.  
818 <https://doi.org/10.1371/journal.pone.0208538>.
- 819 Grantham, M.E., Shingleton, A.W., Dudley, E. & Brisson, J.A. (2020) Expression profiling of winged- and wingless-destined pea  
820 aphid embryos implicates insulin/insulin growth factor signaling in morph differences. *Evolution & Development*,  
821 22, 257–268. <https://doi.org/10.1111/ede.12326>.
- 822 Gray, S.M. & Banerjee, N. (1999) Mechanisms of Arthropod Transmission of Plant and Animal Viruses. *Microbiology and*  
823 *Molecular Biology Reviews*, 63, 128–148. <https://doi.org/10.1128/MMBR.63.1.128-148.1999>
- 824 Guo, H., Zhang, Y., Tong, J., Ge, P., Wang, Q., Zhao, Z., et al. (2020) An Aphid-Secreted Salivary Protease Activates Plant  
825 Defense in Phloem. *Current biology: CB*, 30, 4826–4836.e7. <https://doi.org/10.1016/j.cub.2020.09.020>.
- 826 Gupta, A.K., Scully, E.D., Palmer, N.A., Geib, S.M., Sarath, G., Hein, G.L., et al. (2019) Wheat streak mosaic virus alters the  
827 transcriptome of its vector, wheat curl mite (*Aceria tosichella* Keifer), to enhance mite development and population  
828 expansion. *Journal of General Virology*, 100, 889–910. <https://doi.org/10.1099/jgv.0.001256>.
- 829 Hasegawa, D.K., Chen, W., Zheng, Y., Kaur, N., Wintermantel, W.M., Simmons, A.M., et al. (2018) Comparative transcriptome  
830 analysis reveals networks of genes activated in the whitefly, *Bemisia tabaci* when fed on tomato plants infected  
831 with Tomato yellow leaf curl virus. *Virology*, 513, 52–64. <https://doi.org/10.1016/j.virol.2017.10.008>.
- 832 Hopp, C.S. & Sinnis, P. (2015) The innate and adaptive response to mosquito saliva and Plasmodium sporozoites in the skin.  
833 *Annals of the New York Academy of Sciences*, 1342, 37–43. <https://doi.org/10.1111/nyas.12661>.
- 834 Hou, X., Outhwaite, I.R., Pedi, L. & Long, S.B. (2020) Cryo-EM structure of the calcium release-activated calcium channel Orai  
835 in an open conformation. *eLife*, 9, e62772. <https://doi.org/10.7554/eLife.62772>.
- 836 Huang, H.-J., Liu, C.-W., Xu, H.-J., Bao, Y.-Y. & Zhang, C.-X. (2017) Mucin-like protein, a saliva component involved in brown  
837 planthopper virulence and host adaptation. *Journal of Insect Physiology*, 98, 223–230.  
838 <https://doi.org/10.1016/j.jinsphys.2017.01.012>.
- 839 Ingwell, L.L., Eigenbrode, S.D. & Bosque-Pérez, N.A. (2012) Plant viruses alter insect behavior to enhance their spread.  
840 *Scientific Reports*, 2, 578. <https://doi.org/10.1038/srep00578>.
- 841 Jayasinghe, W.H., Kim, H., Nakada, Y. & Masuta, C. (2021) A plant virus satellite RNA directly accelerates wing formation in its  
842 insect vector for spread. *Nature Communications*, 12, 7087. <https://doi.org/10.1038/s41467-021-27330-4>.

- 843 Johnston, N. & Martini, X. (2020) The Influence of Visual and Olfactory Cues in Host Selection for Bemisia tabaci Biotype B in  
844 the Presence or Absence of Tomato Yellow Leaf Curl Virus. *Insects*, 11, 115.  
845 <https://doi.org/10.3390/insects11020115>.
- 846 Kanamori, Y., Saito, A., Hagiwara-Komoda, Y., Tanaka, D., Mitsumasu, K., Kikuta, S., et al. (2010) The trehalose transporter 1  
847 gene sequence is conserved in insects and encodes proteins with different kinetic properties involved in trehalose  
848 import into peripheral tissues. *Insect Biochemistry and Molecular Biology*, 40, 30–37.  
849 <https://doi.org/10.1016/j.ibmb.2009.12.006>.
- 850 Kanehisa, M. (1996) Toward pathway engineering: a new database of genetic and molecular pathways. *Science & Technology  
851 Japan*, 59, 34–38.
- 852 Kaur, N., Chen, W., Fei, Z. & Wintermantel, W.M. (2019) Differences in gene expression in whitefly associated with CYSDV-  
853 infected and virus-free melon, and comparison with expression in whiteflies fed on ToCV- and TYLCV-infected  
854 tomato. *BMC Genomics*, 20, 654. <https://doi.org/10.1186/s12864-019-5999-0>.
- 855 Kim, S.-H. & Lee, W.-J. (2014) Role of DUOX in gut inflammation: lessons from Drosophila model of gut-microbiota  
856 interactions. *Frontiers in Cellular and Infection Microbiology*, 3, 116. <https://doi.org/10.3389/fcimb.2013.00116>.
- 857 Lemke, S.B. & Schnorrer, F. (2017) Mechanical forces during muscle development. *Mechanisms of Development*, 144, 92–  
858 101. <https://doi.org/10.1016/j.mod.2016.11.003>.
- 859 Li, D., Su, D., Tong, Z., Zhang, C., Zhang, G., Zhao, H., et al. (2019) Virus-Dependent and -Independent Responses of Sitobion  
860 avenae (Homoptera: Aphididae) Feeding on Wheat Infected by Transmitted and Nontransmitted Viruses at  
861 Transcriptomic Level. *Journal of Economic Entomology*, 112, 2067–2076. <https://doi.org/10.1093/jee/toz162>.
- 862 Li, D., Zhang, C., Tong, Z., Su, D., Zhang, G., Zhang, S., et al. (2020) Transcriptome response comparison between vector and  
863 non-vector aphids after feeding on virus-infected wheat plants. *BMC Genomics*, 21, 638.  
864 <https://doi.org/10.1186/s12864-020-07057-0>.
- 865 Li, L., Wang, H., Hu, L., Wu, X., Zhao, B., Fan, Z., et al. (2018) Age associated decrease of sialin in salivary glands. *Biotechnic &  
866 Histochemistry*, 93, 505–511. <https://doi.org/10.1080/10520295.2018.1463453>.
- 867 Li, X., Schuler, M.A. & Berenbaum, M.R. (2007) Molecular mechanisms of metabolic resistance to synthetic and natural  
868 xenobiotics. *Annual Review of Entomology*, 52, 231–253.  
869 <https://doi.org/10.1146/annurev.ento.51.110104.151104>.
- 870 Li, Y., Xiang, Q., Zhang, Q., Huang, Y. & Su, Z. (2012) Overview on the recent study of antimicrobial peptides: Origins, functions,  
871 relative mechanisms and application. *Peptides*, 37, 207–215. <https://doi.org/10.1016/j.peptides.2012.07.001>.
- 872 Liang, Y., Ma, K.-S., Liang, P.-Z., Yang, L.-W., Zhang, L. & Gao, X.-W. (2021) Combined Transcriptomic and Proteomic Analysis  
873 of Myzus persicae, the Green Peach Aphid, Infected with Cucumber Mosaic Virus. *Insects*, 12, 372.  
874 <https://doi.org/10.3390/insects12050372>.
- 875 Liu, S., Chougule, N.P., Vijayendran, D. & Bonning, B.C. (2012). Deep sequencing of the transcriptomes of soybean aphid and  
876 associated endosymbionts. *PLoS One*, 7, e45161. <https://doi.org/10.1371/journal.pone.0045161>.
- 877 Markham, P.G., Pinner, M.S., Raccah, B. & Hull, R. (1987) The acquisition of a caulimovirus by different aphid species:  
878 comparison with a potyvirus. *Annals of Applied Biology*, 111, 571–587. <https://doi.org/10.1111/j.1744-7348.1987.tb02015.x>.
- 880 Mathers, T.C., Chen, Y., Kaithakottil, G., Legeai, F., Mugford, S.T., Baa-Puyoulet, P., et al. (2017) Rapid transcriptional plasticity  
881 of duplicated gene clusters enables a clonally reproducing aphid to colonise diverse plant species. *Genome Biology*,  
882 18, 27. <https://doi.org/10.1186/s13059-016-1145-3>.
- 883 Mathers, T.C., Wouters, R.H.M., Mugford, S.T., Swarbreck, D., Oosterhout, C. van & Hogenhout, S.A. (2021) Chromosome-  
884 Scale Genome Assemblies of Aphids Reveal Extensively Rearranged Autosomes and Long-Term Conservation of the  
885 X Chromosome. *Molecular Biology and Evolution*, 38, 856–875. <https://doi.org/10.1093/molbev/msaa246>.
- 886 Matthews, R.C. (2014) Fundamentals of Plant Virology. Saint Louis: Elsevier Science.

- 887 Mauck, K., Bosque-Pérez, N.A., Eigenbrode, S.D., De Moraes, C.M. & Mescher, M.C. (2012) Transmission mechanisms shape  
888 pathogen effects on host–vector interactions: evidence from plant viruses. *Functional Ecology*, 26, 1162–1175.  
889 <https://doi.org/10.1111/j.1365-2435.2012.02026.x>.
- 890 Mauck, K.E., Chesnais, Q. & Shapiro, L.R. (2018) Evolutionary Determinants of Host and Vector Manipulation by Plant Viruses.  
891 *Advances in Virus Research*, 101, 189–250. <https://doi.org/10.1016/bs.aivir.2018.02.007>.
- 892 Mauck, K.E., De Moraes, C.M. & Mescher, M.C. (2014) Biochemical and physiological mechanisms underlying effects of  
893 Cucumber mosaic virus on host-plant traits that mediate transmission by aphid vectors. *Plant, Cell & Environment*,  
894 37, 1427–1439. <https://doi.org/10.1111/pce.12249>.
- 895 Mauck, K.E., De Moraes, C.M. & Mescher, M.C. (2010) Deceptive chemical signals induced by a plant virus attract insect  
896 vectors to inferior hosts. *Proceedings of the National Academy of Sciences of the United States of America*, 107,  
897 3600–3605. <https://doi.org/10.1073/pnas.0907191107>.
- 898 Mauck, K.E., Kenney, J. & Chesnais, Q. (2019) Progress and challenges in identifying molecular mechanisms underlying host  
899 and vector manipulation by plant viruses. *Current Opinion in Insect Science*, 33, 7–18.  
900 <https://doi.org/10.1016/j.cois.2019.01.001>.
- 901 Mayoral, J.G., Nouzova, M., Navare, A. & Noriega, F.G. (2009) NADP+-dependent farnesol dehydrogenase, a corpora allata  
902 enzyme involved in juvenile hormone synthesis. *Proceedings of the National Academy of Sciences of the United*  
903 *States of America*, 106, 21091–21096. <https://doi.org/10.1073/pnas.0909938106>.
- 904 Naessens, E., Dubreuil, G., Giordanengo, P., Baron, O.L., Minet-Kebdani, H.K. & Coustau, C. (2015) A secreted MIF cytokine  
905 enables aphid feeding and represses plant immune responses. *Current Biology*, 25, 1898–1903.  
906 <https://doi.org/10.1016/j.cub.2015.05.047>.
- 907 Nam, H.-J., Jang, I.-H., You, H., Lee, K.-A. & Lee, W.-J. (2012) Genetic evidence of a redox-dependent systemic wound response  
908 via Hyan protease-phenoloxidase system in *Drosophila*. *The EMBO journal*, 31, 1253–1265.  
909 <https://doi.org/10.1038/emboj.2011.476>.
- 910 Ng, A. & Xavier, R.J. (2011) Leucine-rich repeat (LRR) proteins: Integrators of pattern recognition and signaling in immunity.  
911 *Autophagy*, 7, 1082–1084. <https://doi.org/10.4161/auto.7.9.16464>.
- 912 Patton, M.F., Hansen, A.K. & Casteel, C.L. (2021) Potato leafroll virus reduces *Buchnera aphidicola* titer and alters vector  
913 transcriptome responses. *Scientific Reports*, 11, 23931. <https://doi.org/10.1038/s41598-021-02673-6>.
- 914 Pham, M., Underwood, J. & Oliva Chávez, A.S. (2021) Changing the Recipe: Pathogen Directed Changes in Tick Saliva  
915 Components. *International Journal of Environmental Research and Public Health*, 18, 1806.  
916 <https://doi.org/10.3390/ijerph18041806>.
- 917 Pinheiro, P.V., Ghanim, M., Alexander, M., Rebelo, A.R., Santos, R.S., Orsburn, B.C., et al. (2017) Host Plants Indirectly  
918 Influence Plant Virus Transmission by Altering Gut Cysteine Protease Activity of Aphid Vectors. *Molecular & Cellular*  
919 *Proteomics*, 16, S230–S243. <https://doi.org/10.1074/mcp.M116.063495>.
- 920 Qin, F., Liu, W., Wu, N., Zhang, L., Zhang, Z., Zhou, X., et al. (2018) Invasion of midgut epithelial cells by a persistently  
921 transmitted virus is mediated by sugar transporter 6 in its insect vector. *PLOS Pathogens*, 14, e1007201.  
922 <https://doi.org/10.1371/journal.ppat.1007201>.
- 923 Reinink, K., F. L. Dieleman, J. Jansen & Montenerie, A.M. (1989) Interactions between Plant and Aphid Genotypes in Resistance  
924 of Lettuce to *Myzus Persicae* and *Macrosiphum Euphorbiae*. *Euphytica* 43 (3): 215–22.  
925 <https://doi.org/10.1007/BF00023056>.
- 926 Rispe, C., Kutsukake, M., Doublet, V., Hudaverdian, S., Legeai, F., Simon, J.-C., et al. (2008) Large Gene Family Expansion and  
927 Variable Selective Pressures for Cathepsin B in Aphids. *Molecular Biology and Evolution*, 25, 5–17.  
928 <https://doi.org/10.1093/molbev/msm222>.
- 929 Rodriguez, P.A. & Bos, J.I.B. (2013) Toward understanding the role of aphid effectors in plant infestation. *Molecular plant-*  
930 *microbe interactions: MPMI*, 26, 25–30. <https://doi.org/10.1094/MPMI-05-12-0119-FI>.
- 931 Roux, S.J. & Steinebrunner, I. (2007) Extracellular ATP: an unexpected role as a signaler in plants. *Trends in Plant Science*, 12,  
932 522–527. <https://doi.org/10.1016/j.tplants.2007.09.003>.

- 933 Shang, F., Niu, J., Ding, B.-Y., Zhang, W., Wei, D.-D., Wei, D., et al. (2020) The miR-9b microRNA mediates dimorphism and  
934 development of wing in aphids. *Proceedings of the National Academy of Sciences of the United States of America*,  
935 117, 8404–8409. <https://doi.org/10.1073/pnas.1919204117>.
- 936 Shangguan, X., Zhang, J., Liu, B., Zhao, Y., Wang, H., Wang, Z., et al. (2018) A Mucin-Like Protein of Planthopper Is Required  
937 for Feeding and Induces Immunity Response in Plants. *Plant Physiology*, 176, 552–565.  
938 <https://doi.org/10.1104/pp.17.00755>.
- 939 Stafford-Banks, C.A., Rotenberg, D., Johnson, B.R., Whitfield, A.E. & Ullman, D.E. (2014) Analysis of the salivary gland  
940 transcriptome of *Frankliniella occidentalis*. *PLoS One*, 9, e94447. <https://doi.org/10.1371/journal.pone.0094447>.
- 941 Sterchi, E.E., Stöcker, W. & Bond, J.S. (2008) Meprins, membrane-bound and secreted astacin metalloproteinases. *Molecular*  
942 *Aspects of Medicine*, 29, 309–328. <https://doi.org/10.1016/j.mam.2008.08.002>.
- 943 Su, Y.-L., Li, J.-M., Li, M., Luan, J.-B., Ye, X.-D., Wang, X.-W., et al. (2012) Transcriptomic analysis of the salivary glands of an  
944 invasive whitefly. *PLoS One*, 7, e39303. <https://doi.org/10.1371/journal.pone.0039303>.
- 945 Sylvester, E.S. (1956) Beet yellows virus by the green peach aphid. *J. Econ. Entomol.*, 49, 789–800.
- 946 Tjallingii, W.F. & Hogen Esch, T. (1993) Fine structure of aphid stylet routes in plant tissues in correlation with EPG signals.  
947 *Physiol. Entomol.*, 18, 317–328. <https://doi.org/10.1111/j.1365-3032.1993.tb00604.x>.
- 948 Turner, M.D. (2016) Hyposalivation and Xerostomia: Etiology, Complications, and Medical Management. *Dental Clinics of*  
949 *North America*, 60, 435–443. <https://doi.org/10.1016/j.cden.2015.11.003>.
- 950 Vries, H.I. de, Uyetake, L., Lemstra, W., Brunsting, J.F., Su, T.T., Kampinga, H.H., et al. (2005) Grp/DChk1 is required for G2-M  
951 checkpoint activation in *Drosophila* S2 cells, whereas Dmnk/DChk2 is dispensable. *Journal of Cell Science*, 118,  
952 1833–1842. <https://doi.org/10.1242/jcs.02309>.
- 953 Wang, H., Wu, K., Liu, Y., Wu, Y. & Wang, X. (2015) Integrative proteomics to understand the transmission mechanism of  
954 Barley yellow dwarf virus-GPV by its insect vector *Rhopalosiphum padi*. *Scientific Reports*, 5, 10971.  
955 <https://doi.org/10.1038/srep10971>.
- 956 Wang, W., Luo, L., Lu, H., Chen, S., Kang, L. & Cui, F. (2015) Angiotensin-converting enzymes modulate aphid–plant  
957 interactions. *Scientific Reports*, 5, 8885. <https://doi.org/10.1038/srep08885>.
- 958 Wang, X.-W., Li, P. & Liu, S.-S. (2017) Whitefly interactions with plants. *Current Opinion in Insect Science*, 19, 70–75.  
959 <https://doi.org/10.1016/j.cois.2017.02.001>.
- 960 Wang, X.-X., Zhang, Y., Zhang, Z.-F., Tian, H.-G. & Liu, T.-X. (2016) Deciphering the Function of Octopaminergic Signaling on  
961 Wing Polyphenism of the Pea Aphid *Acyrtosiphon pisum*. *Frontiers in Physiology*, 7, 203.  
962 <https://doi.org/10.3389/fphys.2016.00603>.
- 963 Webster, C.G., Pichon, E., van Munster, M., Monsion, B., Deshoux, M., Gargani, D., Calevro, F., Jimenez, J., Moreno, A., Krenz,  
964 B., Thompson, J.R., Perry, K.L., Fereres, A., Blanc, S. & Uzest, M. (2018) Identification of plant virus receptor  
965 candidates in the stylets of their aphid vectors. *Journal of Virology*, 92, e00432–18.  
966 <https://doi.org/10.1128/JVI.00432-18>.
- 967 Weihe, U., Dorfman, R., Wernet, M.F., Cohen, S.M. & Milán, M. (2004) Proximodistal subdivision of *Drosophila* legs and wings:  
968 the elbow-no ocelli gene complex. *Development*, 131, 767–774. <https://doi.org/10.1242/dev.00979>.
- 969 Will, T., Kornemann, S.R., Furch, A.C.U., Tjallingii, W.F. & Bel, A.J.E. van (2009) Aphid watery saliva counteracts sieve-tube  
970 occlusion: a universal phenomenon? *The Journal of experimental biology*, 212, 3305–3312.  
971 <https://doi.org/10.1242/jeb.028514>.
- 972 Will, T., Steckbauer, K., Hardt, M. & Bel, A.J.E. van (2012) Aphid Gel Saliva: Sheath Structure, Protein Composition and  
973 Secretory Dependence on Stylet-Tip Milieu. *PLoS ONE*, 7, e46903. <https://doi.org/10.1371/journal.pone.0046903>.
- 974 Will, T. & Vilcinskis, A. (2015) The structural sheath protein of aphids is required for phloem feeding. *Insect Biochemistry and*  
975 *Molecular Biology*, 57, 34–40. <https://doi.org/10.1016/j.ibmb.2014.12.005>.

- 976 Xu, J., Willman, M., Todd, J., Kim, K.-H., Redinbaugh, M.G. & Stewart, L.R. (2021) Transcriptome of the Maize Leafhopper  
977 (Dalbulus maidis) and Its Transcriptional Response to Maize Rayado Fino Virus (MRFV), Which It Transmits in a  
978 Persistent, Propagative Manner. *Microbiology Spectrum*. <https://doi.org/10.1128/Spectrum.00612-21>.
- 979 Young, M.D., Wakefield, M.J., Smyth, G.K. & Oshlack, A. (2010) Gene ontology analysis for RNA-seq: accounting for selection  
980 bias. *Genome Biology*, 11, R14. <https://doi.org/10.1186/gb-2010-11-2-r14>.
- 981 Zhang, C.-X., Brisson, J.A. & Xu, H.-J. (2019) Molecular Mechanisms of Wing Polymorphism in Insects. *Annual Review of*  
982 *Entomology*, 64, 297–314. <https://doi.org/10.1146/annurev-ento-011118-112448>.
